# Supplementary material for: Acute-phase proteins during inflammatory reaction by bacterial infection: Fish-model
Source: PubMed Central journal article supplement (PMC6423045; doi:10.1038/s41598-019-41312-z), 2019-03-18
Supplement: 41598_2019_41312_MOESM1_ESM.pdf [file 41598_2019_41312_MOESM1_ESM.pdf]

## Supplementary Information

### Acute-phase proteins during inflammatory reaction by bacterial infection: Fish-model

Ives Charlie-Silva<sup>1</sup>, Andre Klein<sup>2</sup>, Juliana M. M. Gomes<sup>2</sup>; Ed J. R. Prado<sup>1</sup>;  
Alessandra C. Moraes<sup>1</sup>; Silas F. Eto<sup>1</sup>; Dayanne C. Fernandes<sup>1</sup>; José J. Fagliari<sup>1</sup>; José D.  
Corrêa Junior<sup>2</sup>; Carla Lima<sup>3</sup>; Mônica Lopes-Ferreira<sup>3</sup>; Katia Conceição<sup>4</sup>; Wilson G.  
Manrique<sup>5</sup> & Marco A. A. Belo<sup>1,6\*</sup>

<sup>1</sup> Department of Preventive Veterinary Medicine, São Paulo State University (UNESP), Jaboticabal/SP, Brazil.

<sup>2</sup> Department of Pharmacology and Morphology, ICB-UFMG, Belo Horizonte/MG. Brazil.

<sup>3</sup> Laboratory of Immuno Regulation at Unit Butantan Institute, São Paulo/ SP – Brazil.

<sup>4</sup> Laboratório de Bioquímica de Peptídeos, UNIFESP, São José dos Campos/SP, Brazil.

<sup>5</sup> Veterinary College, Federal University of Rondonia, Rolim de Moura, RO, Brazil.

<sup>6</sup>Laboratory of Animal Pharmacology and Toxicology, Brasil University, Descalvado/SP, Brazil.

#### \* Corresponding author:

Marco Antonio de Andrade Belo (PhD)

Laboratory of Animal Pharmacology and Toxicology, Brasil University. Av. Hilário da Silva Passos, 950. Jardim Universitário, Descalvado/SP, 13690-000, Brazil. Phone: +5501935938575. Email: [maabelo@hotmail.com](mailto:maabelo@hotmail.com)

**Attachment 1**  
(SDS-PAGE polyacrylamide gel)

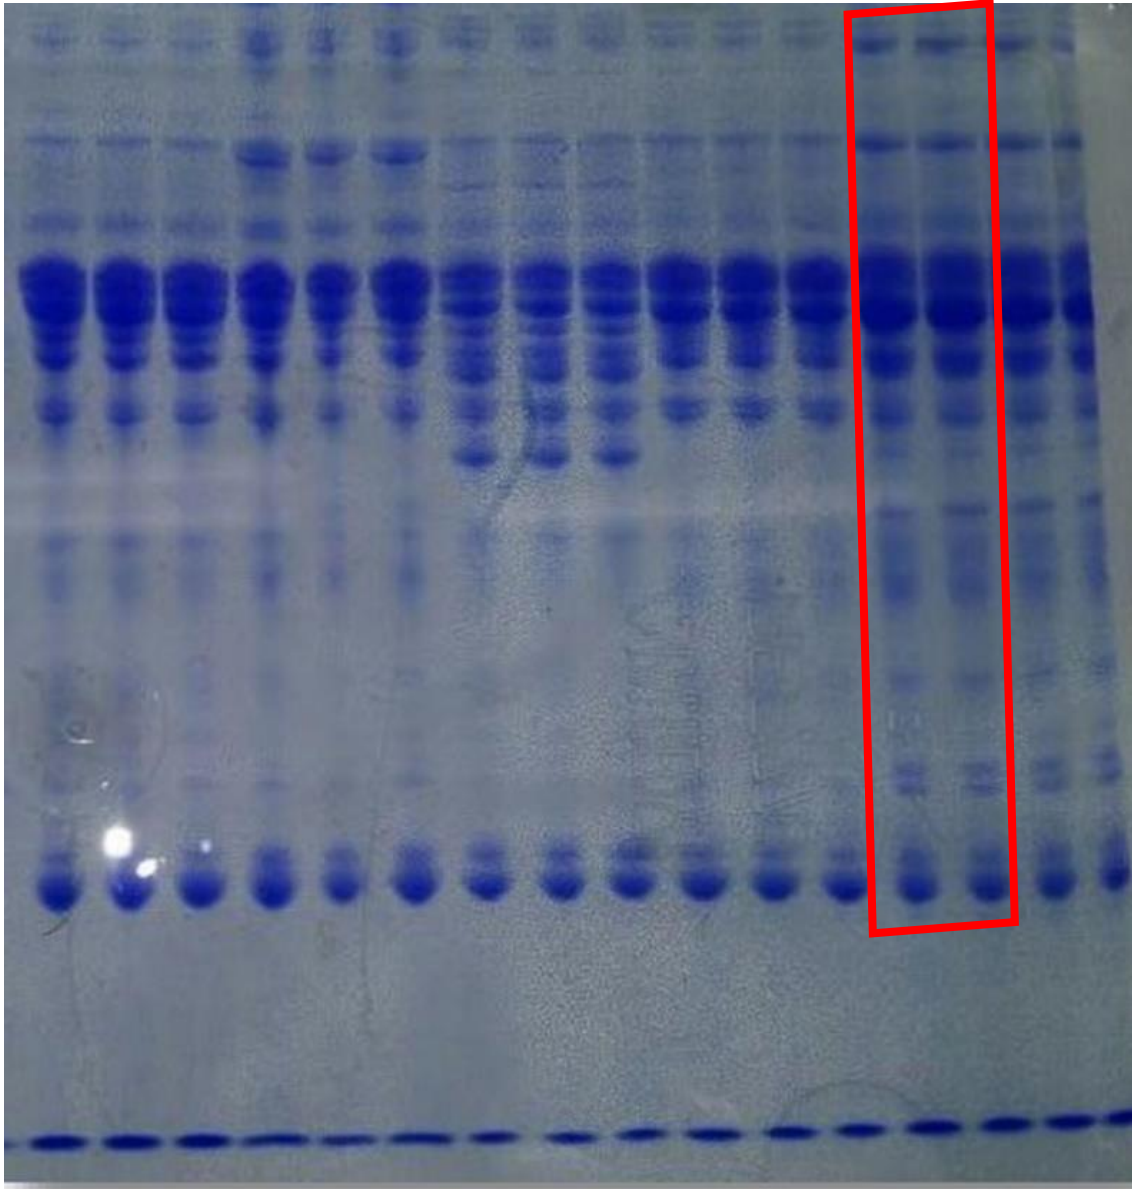

**Figure I.** SDS-PAGE polyacrylamide gel during acute inflammatory response in tilapias 6 and 24 HPI. Highlighted in red the area presented in the Figure 1.

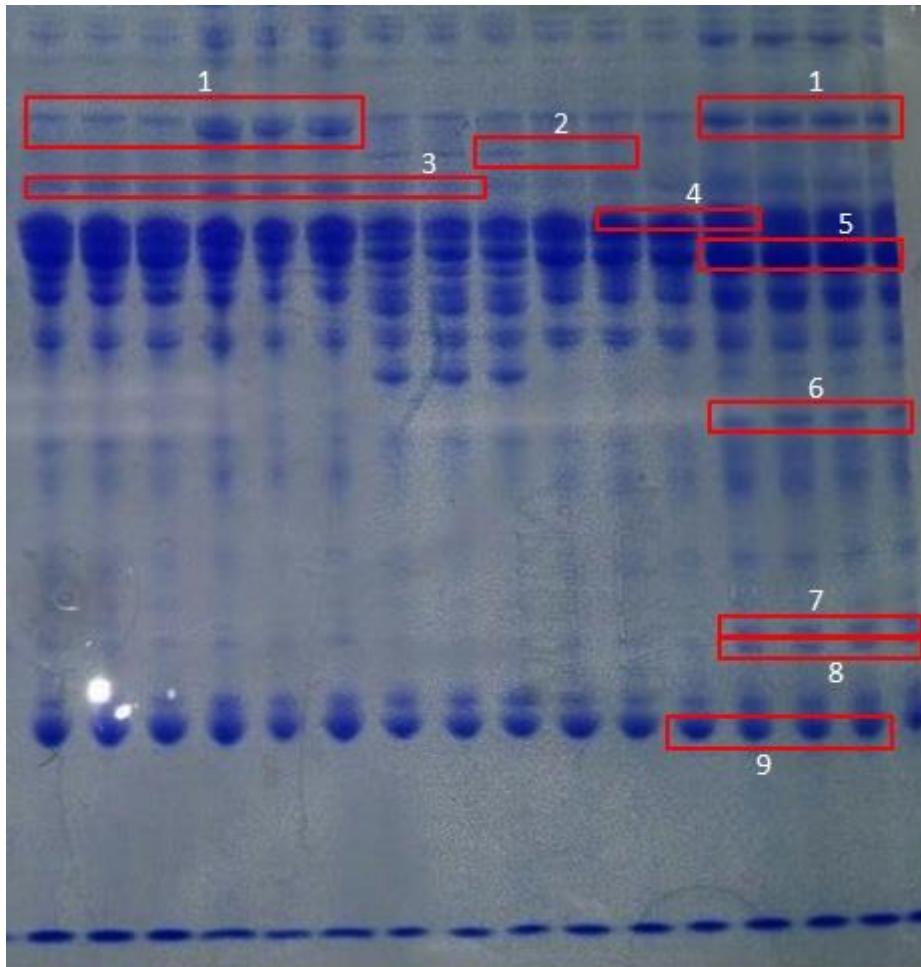

**Figure II.** SDS-PAGE polyacrylamide gel demonstrating the cut areas (highlighted in red) submitted to in gel trypsin digestion coupled to mass spectrometric analysis resulting in the identification of proteins present in the bands (Figure 1). (1) ceruloplasmin; (2) complement C3; (3)  $\alpha_2$  macroglobulin; (4) albumin; (5) transferrin; (6) haptoglobin; (7) apolipoprotein Eb and complement C3 isoform X1; (8) complement factor 3 and apolipoprotein Eb; (9) apolipoprotein A1.

## Attachment 2 (Protein comparative analysis)

|                                        |      |                                                                           |
|----------------------------------------|------|---------------------------------------------------------------------------|
| XP_019212735.1<br>sp P01023 A2MG_HUMAN | 1    | . . MDRLWILSCTLCVLLSWIHVDQVAEPOYHVAIPAVIEAGAEAKFCATLRQSPGLTLMV            |
|                                        | 1    | MGKNGKILHPSLVLLLVLLPPTDA SVSGKPOYMLVLPSSLHTETTERKGCVLRLSYLNETVTV          |
| XP_019212735.1<br>sp P01023 A2MG_HUMAN | 59   | TVTMSREKNTLFTHTSN E . AFQT CVQFKAP . . LVQKEVQHFOVEVRGDTFYSKQVTKV         |
|                                        | 61   | SASLESVVRGNRSLFTDLEAENDVLHCVAFAVAPKSSSN EVMFLLIVQVKGPTQEFKRRITV           |
| XP_019212735.1<br>sp P01023 A2MG_HUMAN | 116  | MIQTYDPFTFIQTDKPIYLPQKVNFRVVTMDNKM RPANQLYDVI EIQDPNSNRI GQWLN            |
|                                        | 121  | MVKNEDSLV FVQTDKSIYKPGQTVKFRVVSMDENFHPLENLIPLVYIQDPKGNRI AQWQS            |
| XP_019212735.1<br>sp P01023 A2MG_HUMAN | 176  | ETSSSRILQLSVSLDTEAREGPYQIIVSMGER . KISHNFKVEK YVLPKFDVTVNTSEEVS           |
|                                        | 181  | FQLEGG LKQFSEPLSSEPFQGSYKVVVQKKS GGRTEHPFTEVEFVLPKFEVQVTVPKIIT            |
| XP_019212735.1<br>sp P01023 A2MG_HUMAN | 235  | IQQEDTEAKVC AKYTYGQVPVGRVTNVCRPIKYF F HGVSVSHS EDDLALLQISAPCHTE T         |
|                                        | 241  | ILEEEMNVSVSGLYTYGKVPVGHVTVSICR . . . . . KYSDASDCHGED . . . . . SQAFCEKFS |
| XP_019212735.1<br>sp P01023 A2MG_HUMAN | 295  | KQADKTGCATFSFNMSIFTKVDQKVLHDVLDIRAKVEEECTGISHPQEKRRIRISYVVLGKV            |
|                                        | 292  | GQLNSHGC FYQVVKTKVFLK . RKEYEMK LHTBAQIQEECTVVELTGRQSSEITRTITKL           |
| XP_019212735.1<br>sp P01023 A2MG_HUMAN | 355  | SFINMPKVWERGSNVEGKVRAYHNNTPVCDAPVYLFTGQMRQTHSLQNLTTDSNGVASF               |
|                                        | 351  | SFVKVDSHFROGIPFFGQVRLVDGKGVPIPNKVIFIRG . . NEANYYSNATTEHGLVQF             |
| XP_019212735.1<br>sp P01023 A2MG_HUMAN | 415  | SFSTDNFDQDIQLHASLTPVDYPRYAAFYDRGFHILSMSQPSSPDIKTISSELEVQIND               |
|                                        | 408  | SINTNVMGTSLTVRVNYKDRSPCYQWVSEHEEAHHTAYLVFSPSKS FVLEPMS . .                |
| XP_019212735.1<br>sp P01023 A2MG_HUMAN | 475  | KAVACDAEEDISVNYTIVGESP . . . . . SVDVIYLVLSRGAVTM OGQKQVEVQDRSVTEGQV      |
|                                        | 466  | HELPCGHTQTVOAHYIILNGGTL LGLLKKLSFY YLIMAKGGLVR TGTHGLLVK . QEDMKGHF       |
| XP_019212735.1<br>sp P01023 A2MG_HUMAN | 532  | SFKVVRVSP EMAP EFQVVA YAVLPS E DVI AHSA D FSTDKCF SNKVSVE FSPSAVPG EETN   |
|                                        | 525  | SISIPVKS DIAPVARLLIYAVLPTGDVIGD SAKYDVENCLANKV DLS FSPSOSLPASHAH          |
| XP_019212735.1<br>sp P01023 A2MG_HUMAN | 592  | MQVMALPHSLCVCVSAIDKSVL I KE PGK L DADKIFD LFLPKKSGIPEYVD DATECLNVR        |
|                                        | 585  | LRVTAAPQSVCA LRAVDQSVLLMKPDAE LSASVYNNLPLPKDLTGFGPLNDQDNEDCIN             |
| XP_019212735.1<br>sp P01023 A2MG_HUMAN | 652  | PK . . . . . RYVLEPYRQEQNDAY AIFQK VGLKMATNLLIRLPSCLQFKGKFYHERSHRVY       |
|                                        | 645  | RHN VYINGITYTPEVSSINEKDMY SFL E D MGLKAF TNSKIRRP . . . . . KMCPQLQYVE    |
| XP_019212735.1<br>sp P01023 A2MG_HUMAN | 706  | YAMAPRF RDNSIRLSSPVAASAGNDLAP E P A I ETVRSFP PETWIDLVEVGDGKRGVSL         |
|                                        | 697  | MHGPEGLRVGFYESDVMGRGHARLVHVEEPHT ETVRKFP PETWIDLVVNSAGVAE VGV             |
| XP_019212735.1<br>sp P01023 A2MG_HUMAN | 766  | TVPDTITWETEAFCLSSQG . FGLAPRKE MKVFOFF FELTMPYSIRGEHFLKATVFN              |
|                                        | 757  | TVPDTITWKAGAFCLSE DAGLGLSSSTAS LRAFOPFFVELTMPYSIRGEAFLKATVFN              |
| XP_019212735.1<br>sp P01023 A2MG_HUMAN | 825  | YLTSCIMVTVTPGPS SDYTLITPLSGDLYTSCHCANERKTLRWTMIPALGAVNVTVSAEA             |
|                                        | 817  | YLPK CIRVSVQLEASPAFLAVPVKEQAPHCHCANGROT VSWAVTPEKSLGNVNF TVSAEA           |
| XP_019212735.1<br>sp P01023 A2MG_HUMAN | 885  | VASHVSCDNEVSVVDPDRGRIDVVTKSLIVKAEGETEMTKTYNWL LCPK GSP L TEEAEIHL P       |
|                                        | 877  | LESQELCGTEVP SVPEHGRKDTVIKPLLV EPEGLEKETENS L LCPSGGEVSEELSLKLP           |
| XP_019212735.1<br>sp P01023 A2MG_HUMAN | 945  | ENVTEGSARTSVSVLGDILGRALKNLDG LLQMPYGCGEQNMAL L APNIYI LHYLKGTOQL          |
|                                        | 937  | PNVTEGSARASVSVLGDILGSAMONTQN LLQMPYGCGEQNMV L F APNIYVLDVYLNETOQL         |
| XP_019212735.1<br>sp P01023 A2MG_HUMAN | 1005 | TTAIMEKATNFLTSGYQRLNYK S ADGAYTTFCTGPG . . . . . NTWLTAFVVRSESKAQSFV      |
|                                        | 997  | TPEIKSKAIGYLNLTGYQRLNYKH YDGSYSTFGERYGRNQGN TWLTAFVVKTEFAQARAYI           |
| XP_019212735.1<br>sp P01023 A2MG_HUMAN | 1061 | YIDPRKIEESKSWLQHRQENGCPEKSGKLFNNRMKGGVSEDEVLSAYVTAALLEMNTSQ               |
|                                        | 1057 | FIDEAHI TQALIWLSQRQKDNCCRS SGLNNAIKGGVEDEVLSAYITIALLEIPLTV                |
| XP_019212735.1<br>sp P01023 A2MG_HUMAN | 1121 | HDVPMNKS LACIKESLSDLSN . . . . . YTTALLAYVFTLAGDVE TRAHLLQHLDTVAVR        |
|                                        | 1117 | THPVVRNALFCIESAWKTAQEGDHGSHVYTKALLAYAFALAGNDRKKEVLKSLNEEAVK               |
| XP_019212735.1<br>sp P01023 A2MG_HUMAN | 1175 | EGGFLYWSQTAETS . . . . . ASLSEISSYVLLAKLSAS . . PTAEDLGYASGIIR            |
|                                        | 1177 | KDNSVHWERPQKPKAPVGHFYEPQAPSAEVE MTSYVLLAVLTAQAP TSEDLTSA TNIVK            |
| XP_019212735.1<br>sp P01023 A2MG_HUMAN | 1223 | WITGQONYYGGFSSQTDTVVALQALALYSTLVFSP EGWSVTVQAPSSQLT . . FDNQSN            |
|                                        | 1237 | WITKQONAOGGFSSQTDTVVALHALSKYGAATFTRTGKAAQVTTIQSSGTFSSK FQVDNNN            |
| XP_019212735.1<br>sp P01023 A2MG_HUMAN | 1281 | KLLYQEEALQDVSGKYSIEVKG TACASVOISATYNIPTADVTTLSVKVQLEVNITSES .             |
|                                        | 1297 | RLLLQOVSLPELPGEYSMKVTEGECVYLOTSLKYNI LPEKEEFPFALGVO TLPQTCD EPK           |
| XP_019212735.1<br>sp P01023 A2MG_HUMAN | 1340 | ARPKFTVQIQSLYSGKEKT TNMVIDIKMISGFSPDPE SIKSLKHLGLLVS RVEQKEDHVL           |
|                                        | 1357 | AHTSFQISLSVSYTGRSASNNMAIWDVKM VSGFIP LKPTVKMLERSNHVS RVEVSSNHVL           |
| XP_019212735.1<br>sp P01023 A2MG_HUMAN | 1400 | VYLEEIPKDTPI NHSLDI IQELPVDN LKPAVVKIYDYYQPGDQAE TOYMFVS . . . . .        |
|                                        | 1417 | IYLD R VSNQ T . LSLFFTVIQDVPV RDLKPAIVK VYDYYETDEFAIABYNAPCSKDLGNA        |

**Figure III.** Structural comparison of the alpha-2-macroglobulin between *Oreochromis niloticus* and *Homo sapiens*. The FASTA files related to tilapia and human proteins were acquired on the UNIPROT search platform (<http://www.uniprot.org>).



|                                        |      |                                                                 |
|----------------------------------------|------|-----------------------------------------------------------------|
| XP_021322235.1<br>sp P01023 A2MG_HUMAN | 1    | MALIVSCCLKGFFLIFLFLCVNGNKRPIFMVTFPAVIESGSDAKLCASLTKPNKTLFPM     |
|                                        | 1    | MGKNKLLHPSLVLLLVLPDASVSGKPKQVMVLPSPSLHTEETEGCVLLSYLNETVTV       |
| XP_021322235.1<br>sp P01023 A2MG_HUMAN | 61   | NIYLVHSNQSLTLLQEKAEQEFHRCFNFOAP.LAAEASVQKIKVEIQGSESNMTEERKV     |
|                                        | 61   | SASLESVRGNRSLFTDLAEADVLCVAFVPEKSSSNSEVMFLTVQVKGPTQEFKRRITV      |
| XP_021322235.1<br>sp P01023 A2MG_HUMAN | 119  | MFKSYHPLETFQMDKPFYIAQGTVNFVRVTFMDKSFRTDQQYSAVVLEDSQDNRIQWNTN    |
|                                        | 121  | MVKNEEDSLVFWQTDKSLYKPGQTVKFRVVSMDENFHPNELIPLVYIQDPKGNRIAQWQS    |
| XP_021322235.1<br>sp P01023 A2MG_HUMAN | 179  | VSTRWILORSYDLNPEAREGTIVKAFIFIG.ERMISHDFDVKKIVLPKFGVFIISPNPVS    |
|                                        | 181  | FQLEGGKQFSEPLSEPFQGSYKVVVQKKSGRTEHPFTVVEEFLVLPKFEVQVTVPKIIT     |
| XP_021322235.1<br>sp P01023 A2MG_HUMAN | 238  | IDDEFMVIIEVCGKYTYGKPVLGKSVKVCRTLDT.....HSPLCVKESTEISKTGCA       |
|                                        | 241  | ILDEEMNVSVCGLYTYGKPVGHVTVSICRKYSDASDCHGEDSQAFCKKFSGQLNSHGCF     |
| XP_021322235.1<br>sp P01023 A2MG_HUMAN | 291  | NHTIALSVFYPTHHQLLNDLHIETATEEETETITMTQSNITISTEYIGKVTFTDLPKTY     |
|                                        | 301  | YQVQKTKVFLK.RKREYEMKLEHAEQIQEEGTVEELTGRQSSSEIIRTITKLSFVKVDSHE   |
| XP_021322235.1<br>sp P01023 A2MG_HUMAN | 351  | EYGSVIEGKVKLARFRCTAVPGKHTYILENYSWPPKVLNLTDSNGLANFSINTLRFVVK     |
|                                        | 360  | ROGIPFFGQVRLVDGKGVIPNKKVIFIRGNAN...YYSNATTEDEHGLVQFSINTTNVMG    |
| XP_021322235.1<br>sp P01023 A2MG_HUMAN | 411  | SDINLMASAYPGYRSYFQKSPYFNTEKTVQFFPKPAASYPTPTFSELIENIEQPLKCGT     |
|                                        | 417  | ISLTVRVNYKDRSPCYG...YQWVSEHEEAHTAYLVFSPSKSFVHLEPMSHELPCGH       |
| XP_021322235.1<br>sp P01023 A2MG_HUMAN | 471  | EITATVKYFVKEVTK.TFNADIVYVLSRGVIHGHGKVEVKSNAVASGTMSEFKLSV        |
|                                        | 473  | TQTVQAHYILNGGTLGLGKLLSFYVLMKAGCTVTRTGTHGLLVKQEE..DMKGFHSISITPV  |
| XP_021322235.1<br>sp P01023 A2MG_HUMAN | 530  | GADVAPLVQITLAYCVLPSENIAIHSNFHVEKCLKNKVSLOFSPAKAVPGEKNTLQLSAQ    |
|                                        | 531  | KSDTAPVARLLIYAVLPTGDVIIGDSAKYDVENCLANKVDLSFSPSQSLPASHAHLRVTAA   |
| XP_021322235.1<br>sp P01023 A2MG_HUMAN | 590  | PGSHGLS AVDQSVLMEESGKR.LDADKIFNLLPVKYGSGYSSLPDE..KCFYMMAVPI     |
|                                        | 591  | POSWCALR AVDQSVLMEKPDALSAASSVYNLLPEKDLTGFPGLNDQDNEDCINRHNVI     |
| XP_021322235.1<br>sp P01023 A2MG_HUMAN | 648  | ENIFKS.....SKRIGLKMATNLAVRSCTSTCEMYKKFMSFAILPVDLFRDI            |
|                                        | 651  | NGITYTPVSSNEKDMYSFLEDMGLKRAFNSKIRKPKMCPQLQYEMHGPEGLRVGFYSE      |
| XP_021322235.1<br>sp P01023 A2MG_HUMAN | 695  | GLAEDSVPHWTLFEEEN...VRSVFPKTLWOLIEISDSGSAEVPVTPDITISWETEAF      |
|                                        | 711  | DVMGRGHARLVHVHEEPTETVRKYFETWINDLVVNSAGVAEVEVTPDITIEWKAGAF       |
| XP_021322235.1<br>sp P01023 A2MG_HUMAN | 751  | CLSTG.LGLAPPQALVFQPFLELSPYSIRGEMFBLKATVFNYSKCIIMVKVSPAP         |
|                                        | 771  | CLSEADAGLGISSTASLRAFOPFFVELTMPYSVIRGEAFTLKATVFNLYLPKCIIRVSVQLEA |
| XP_021322235.1<br>sp P01023 A2MG_HUMAN | 810  | SDYTLKASSDQYSSCHCANGRKTFKWLTFVSVIGVNVTVRAEAESAQTVCNDEIVSV       |
|                                        | 831  | SPAELAVPVEKEQAPHCHCANGROTFSWAVTEKSLGNVNTVSAEELSLKCTEIVSV        |
| XP_021322235.1<br>sp P01023 A2MG_HUMAN | 870  | PERGRIDTVTRSLLVQAECTKKAKTNSWLLCPKGDSELEEDLTLPLKDMIEGSVTSVSV     |
|                                        | 891  | PEHGRKDTVIRKPLLEVEPEGLKKEKTFNSLLCPSGGEVSEELSLKLPNVEESAARASVSV   |
| XP_021322235.1<br>sp P01023 A2MG_HUMAN | 930  | IGDIVGRSLKLLHRTLWRIYRSNGNIAIILSPSIYILOYLENTRKQLTSAIREKASSFLKS   |
|                                        | 951  | LGDILGSAMQNTQNLQMPYGCGEQNMVLFAPNIYVLDYLNETOQLTPEIKSKAIGVINT     |
| XP_021322235.1<br>sp P01023 A2MG_HUMAN | 990  | GYQROLKYRHRNGAYSTFGN...GKNALWLTAFVLKSEFVKAQKYIYIDPQITKSAKKWL    |
|                                        | 1011 | GYQROLNYKHYGSGSYSTFGERYGRNQNTWLTAFVLKTEAQARAYEIDEAHTQALIWL      |
| XP_021322235.1<br>sp P01023 A2MG_HUMAN | 1046 | IGTODPEGCFIQHGRLFNRLKGGVSDHVTMTAYITASLLELETSTVDPIIKGLSCLRS      |
|                                        | 1071 | SQRQKDN GCFRSSGSLNNAIKGGVSDHVTLSAYITIALLEIPLTVHHPVVRNALFCLES    |
| XP_021322235.1<br>sp P01023 A2MG_HUMAN | 1106 | VIKDVKN.....TYTALLAYTFSLARDTNTREQQLFNKTEDLAIISDGPLVHWSQSAS..    |
|                                        | 1131 | AWKTAQEGDHGSHVYTKALLAYAFALAGNQDKRKEVLSKSLNEEAVKKKDNSVHWERPQKPK  |
| XP_021322235.1<br>sp P01023 A2MG_HUMAN | 1158 | .....ADDSDSLDVEISSYVLLAVLTA.D.SLTTADLGFANRIVSWLVKQNA YGGFSS     |
|                                        | 1191 | APVGHFYEPQAPSAEVEMTSYVLLAYLTAQPAPTSSEDTSATNIVKWIITKQNAQGGFSS    |
| XP_021322235.1<br>sp P01023 A2MG_HUMAN | 1210 | TQDTVVALQALSLYATKVFSDDGSSVTVQV.SAG..D.SHYFNVDNKNLVYQEKQLANVPG   |
|                                        | 1251 | TQDTVVALHALSKYGAATFTRTGKAAQVTIQSSGTFSSKEQVDNKNRLLQVQVSLPELPG    |
| XP_021322235.1<br>sp P01023 A2MG_HUMAN | 1268 | KYKTEVKGSA CVSVQMAQFYNILTPKEVKTLSDVKIEGCKKKT..FGNKLLEFETVNYD    |
|                                        | 1311 | EYSMKVTEGCVYLOQTSLYNILPEKEFFPALGVQTLPTQCDPEKAHTSFQISLSVSYT      |
| XP_021322235.1<br>sp P01023 A2MG_HUMAN | 1326 | GPHEETNMLIVDVKLLSGFTADDTFMFGSSSGFYVPLVEQVDYKDDHVIIVYKKEVPKHFP   |
|                                        | 1371 | GSRSASNMAIVDVKVMVSGFIPLKPTVMKMLE...RSNHVSRTEVSSNHHVLIYLDKVSNTQ. |
| XP_021322235.1<br>sp P01023 A2MG_HUMAN | 1386 | VNYQIQMKQVTHVMNLKPAVIVKYDYYQTSQSETEYFHC.....                    |
|                                        | 1427 | LSLFFTVLQDVPVRDLKPAIVKYDYYETDEFAIAEYNAPCSKDLGNA                 |

**Figure IV.** Structural comparison of the alpha-2-macroglobulin between *Danio rerio* and *Homo sapiens*. The FASTA files related to zebrafish and human proteins were acquired on the UNIPROT search platform (<http://www.uniprot.org>).

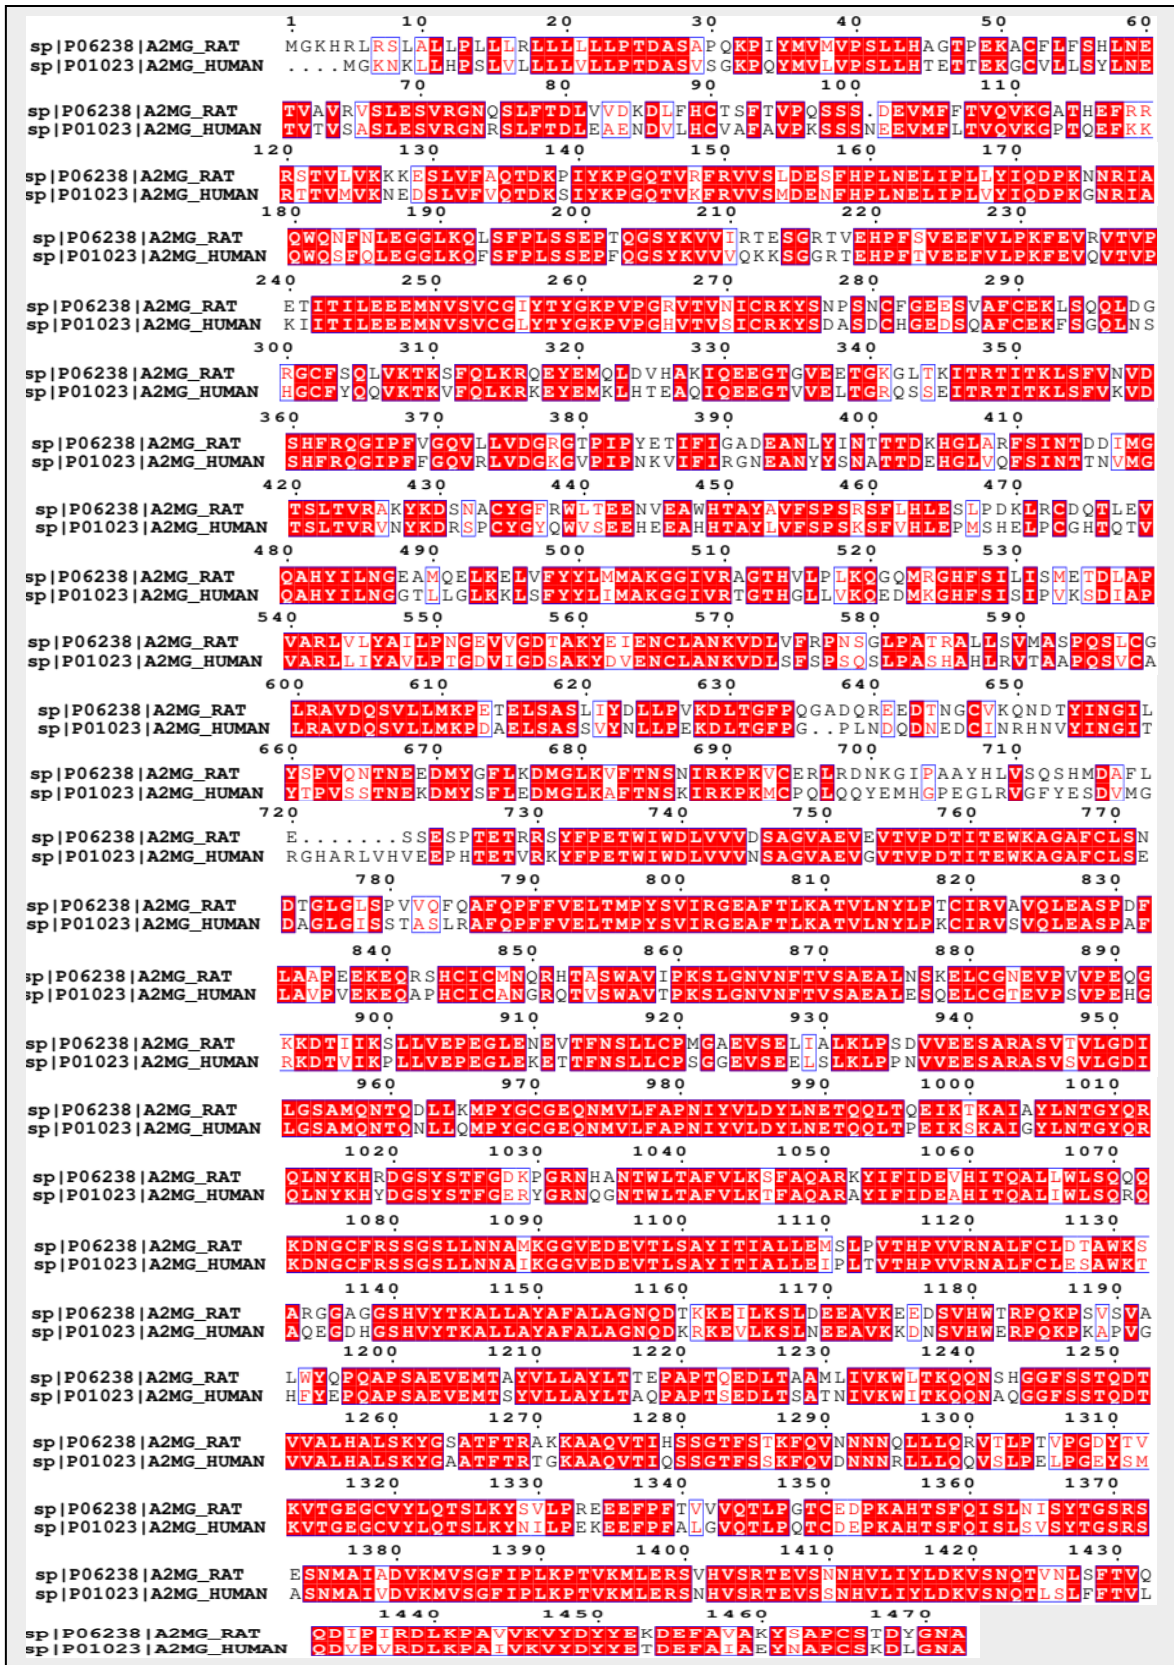

**Figure V.** Structural comparison of the alpha-2-macroglobulin between *Rattus norvegicus* and *Homo sapiens*. The FASTA files related to rodent and human proteins were acquired on the UNIPROT search platform (<http://www.uniprot.org>).





|                        |     |                                                                                                                         |
|------------------------|-----|-------------------------------------------------------------------------------------------------------------------------|
| tr I7J7R5 I7J7R5_ORENI | 1   | MK F V A L A L T L L L A V G S Q A S L Q A D A P . . . S Q L A Q I R S A V D V Y L T Q A K E G A I K A L D Q L D D T    |
| sp P02647 APOA1_HUMAN  | 1   | M K A A V L T L A V L F L T G S Q A R H F W Q Q D E P P Q S P W D R V K D L A T V Y V D V L K D S G R D Y V S Q F E G S |
| tr I7J7R5 I7J7R5_ORENI | 58  | P Y . Q E F K V I L A Q R L E D L H T Q V K A L Q G S V A P V T D S V F T T V S E A T A E L R S N I A T D I E A L R T E |
| sp P02647 APOA1_HUMAN  | 61  | A L G K Q L N L K L L D N W D S V T S T F S K L R E Q L G P V T Q E F W D N L E K E T E G L R Q E M S K D L E E V K A K |
| tr I7J7R5 I7J7R5_ORENI | 117 | L E P K R A H L R E V I D R H I E D Y R S R L Q E V I S E Y Y A K H T A E M D E L K T K I E P I M T E I R E K I R T N V |
| sp P02647 APOA1_HUMAN  | 121 | V Q P Y L D D F Q K K W Q E E M E L Y R Q K V E P L R A E L Q E G A R Q K L H E L Q E K L S P L G E E M R D R A R A H V |
| tr I7J7R5 I7J7R5_ORENI | 177 | E E T K A A L T P I V E S I R A R V A T H V E Q A K A M L A P Y V E E Y K E Q L R Q A Y D H A H N V R A E D L T A L R A |
| sp P02647 APOA1_HUMAN  | 181 | D A L R T H L A P Y S D E L R Q R L A A R L E A L K E N G G A R L A E Y H A K A T E H L S T L S E K A K P A L E D L R Q |
| tr I7J7R5 I7J7R5_ORENI | 237 | K I N P L A E D I K T K L Q Q I F A I L S E T F T K S                                                                   |
| sp P02647 APOA1_HUMAN  | 241 | G L L P V L E S F K V S F L S A L E E Y T K K L N T Q                                                                   |

**Figure VII.** Structural comparison of the apolipoprotein A1 between *Oreochromis niloticus* and *Homo sapiens*. The FASTA files related to tilapia and human proteins were acquired on the UNIPROT search platform (<http://www.uniprot.org>).

|                       |     |                                                                                                                           |
|-----------------------|-----|---------------------------------------------------------------------------------------------------------------------------|
| sp O42363 APOA1_DANRE | 1   | M K F V A L A L T L L L A L G S Q A N L F Q A D A P . . . T Q L E H Y K A A A L V Y L I N Q V K D Q A E K A L D N L D G T |
| sp P02647 APOA1_HUMAN | 1   | M K A A V L T L A V L F L T G S Q A R H F W Q Q D E P P Q S P W D R V K D L A T V Y V D V L K D S G R D Y V S Q F E G S   |
| sp O42363 APOA1_DANRE | 58  | D Y . E Q Y K L Q L S E S L T K L Q E Y A Q T T S Q A L T P Y A E T I S T Q L M E N T K Q L R E R V M T D V E D L R S K   |
| sp P02647 APOA1_HUMAN | 61  | A L G K Q L N L K L L D N W D S V T S T F S K L R E Q L G P V T Q E F W D N L E K E T E G L R Q E M S K D L E E V K A K   |
| sp O42363 APOA1_DANRE | 117 | L E P H R A E L Y T A L Q K H I D E Y R E K L E P V F Q E Y S A L N R Q N A E Q L R A K L S P L M D D I R K A F E S N I   |
| sp P02647 APOA1_HUMAN | 121 | V Q P Y L D D F Q K K W Q E E M E L Y R Q K V E P L R A E L Q E G A R Q K L H E L Q E K L S P L G E E M R D R A R A H V   |
| sp O42363 APOA1_DANRE | 177 | E E T K S K V V P M V E A V R T K L T E R L E D L R T M A A P Y A E E Y K E Q L V K A V E E A R E K I A P H T Q D L Q T   |
| sp P02647 APOA1_HUMAN | 181 | D A L R T H L A P Y S D E L R Q R L A A R L E A L K E N G G A R L A E Y H A K A T E H L S T L S E K A K P A L E D L R Q   |
| sp O42363 APOA1_DANRE | 237 | R M E P Y M E N V R T T F A Q M Y E T I A K A I Q A .                                                                     |
| sp P02647 APOA1_HUMAN | 241 | G L L P V L E S F K V S F L S A L E E Y T K K L N T Q                                                                     |

**Figure VIII.** Structural comparison of the apolipoprotein A1 between *Danio rerio* and *Homo sapiens*. The FASTA files related to zebrafish and human proteins were acquired on the UNIPROT search platform (<http://www.uniprot.org>).



|                       |     |                                                               |
|-----------------------|-----|---------------------------------------------------------------|
| sp P04639 APOA1_RAT   | 1   | MKAAVLAVLVFLTGCAWEFWQDEPQSQWDRVKDFATVYVDVVKDSGRDYVSQFESS      |
| sp P02647 APOA1_HUMAN | 1   | MKAAVLTDAVLFLLTGSQARHFWQDEPPQSPWDRVKDLATVYVDVVKDSGRDYVSQFEGS  |
| sp P04639 APOA1_RAT   | 60  | TLGKQLNINLLDNWDTLSTVGRLEQLGPVTQEFWANLEKETDWRNEMNKDLENVKQK     |
| sp P02647 APOA1_HUMAN | 61  | ALGKQLNLIKLLDNWDSVSTVFSKLEQLGPVTQEFWDNLEKETEGLRQEMSKDLEEVKAK  |
| sp P04639 APOA1_RAT   | 120 | MQPHLDEFQEKWNEEVEAYRQKLEPLGTTELHK...NAKEMQRHLKVVAAEEFRDRMRVNA |
| sp P02647 APOA1_HUMAN | 121 | VQPYLDDFQKQWQEEEMELYRQKVEPLRAELQEGARQKLHELEKELSPLGEEMRDRARAHV |
| sp P04639 APOA1_RAT   | 176 | DALRAKFGLYSDQMRNLAQRLETKN.HPTLIEYHTKASDHLKTLGKAKPALDDLGO      |
| sp P02647 APOA1_HUMAN | 181 | DALRTHLAPYSDELRRQLARLEALKENGGARLAEYHAKATEHLSTLSEKAKPALEDLRO   |
| sp P04639 APOA1_RAT   | 234 | GLMPVLEAKKAKIMSMIDEAKKKNLA.                                   |
| sp P02647 APOA1_HUMAN | 241 | GLLPVLESFKVSVLSALEEYTKKLNTO                                   |

**Figure IX.** Structural comparison of the apolipoprotein A1 between *Rattus norvegicus* and *Homo sapiens*. The FASTA files related to rodent and human proteins were acquired on the UNIPROT search platform (<http://www.uniprot.org>).

|                       |     |                                                               |
|-----------------------|-----|---------------------------------------------------------------|
| sp Q00623 APOA1_MOUSE | 1   | MKAVVLAVALVFLTGSQAVHFWQDEPQSQWDRVKDFANVYVDVVKDSGRDYVSQFESS    |
| sp P02647 APOA1_HUMAN |     | MKAAVLTDAVLFLLTGSQARHFWQDEPPQSPWDRVKDLATVYVDVVKDSGRDYVSQFEGS  |
| sp Q00623 APOA1_MOUSE | 60  | SLGQQLNINLLENWDTLSTVSRQLERLGLPLTRDFWDNLEKETDWRQEMNKDLEEVKQK   |
| sp P02647 APOA1_HUMAN |     | ALGKQLNLIKLLDNWDSVSTVFSKLEQLGPVTQEFWDNLEKETEGLRQEMSKDLEEVKAK  |
| sp Q00623 APOA1_MOUSE | 120 | VQPYLDEFQKKWKEDVELYRQKVAPLGAELQESARQKLELQGLRSPVAEEFRDRMRTHV   |
| sp P02647 APOA1_HUMAN |     | VQPYLDDFQKKWQEEEMELYRQKVEPLRAELQEGARQKLHELEKELSPLGEEMRDRARAHV |
| sp Q00623 APOA1_MOUSE | 180 | DSLRTQLAPHSSEQMRSLAQRLEALKSN.PTLNEYHTRAKTHLKTLEKAKPALEDLRH    |
| sp P02647 APOA1_HUMAN |     | DALRTHLAPYSDELRRQLARLEALKENGGARLAEYHAKATEHLSTLSEKAKPALEDLRO   |
| sp Q00623 APOA1_MOUSE | 240 | SLMPMLETLKTKVQSVIDKASETLTAQ                                   |
| sp P02647 APOA1_HUMAN |     | GLLPVLESFKVSVLSALEEYTKKLNTO                                   |

**Figure X.** Structural comparison of the apolipoprotein A1 between *Mus musculus* and *Homo sapiens*. The FASTA files related to rodent and human proteins were acquired on the UNIPROT search platform (<http://www.uniprot.org>).

|                                                |      |       |      |     |    |       |       |       |       |       |       |       |       |       |       |       |       |       |       |       |       |       |       |       |       |       |    |    |    |
|------------------------------------------------|------|-------|------|-----|----|-------|-------|-------|-------|-------|-------|-------|-------|-------|-------|-------|-------|-------|-------|-------|-------|-------|-------|-------|-------|-------|----|----|----|
| tr I3JNN4 I3JNN4_ORENI<br>sp P00450 CERU_HUMAN | 1    | MLRLD | LR   | AV  | LL | LF    | CV    | VS    | GM    | RE    | YF    | LK    | IE    | EV    | SW    | NA    | PT    | GR    | NI    | IQ    | NR    | SI    | IQ    | DD    | EA    | SI    | FL |    |    |
|                                                | 1    | ..MKI | LI   | LI  | GI | LF    | LC    | ST    | PA    | WA    | KE    | HY    | IG    | IE    | ET    | TD    | YA    | SD    | HG    | ..EK  | LI    | SV    | DT    | EH    | SN    | IT    | LT |    |    |
| tr I3JNN4 I3JNN4_ORENI<br>sp P00450 CERU_HUMAN | 61   | KSGE  | QR   | IG  | ST | YK    | KAV   | YK    | OY    | SD    | AT    | YR    | TE    | VT    | KA    | EW    | LG    | YLG   | PL    | MA    | EG    | DT    | LI    | VH    | LKN   | AS    | RP |    |    |
|                                                | 57   | QNGE  | DR   | IG  | RI | YK    | KAV   | YI    | OY    | TD    | TE    | FT    | RT    | TE    | EP    | WV    | LG    | YLG   | PI    | KA    | ET    | GD    | KV    | YV    | VH    | LKN   | LA | SR |    |
| tr I3JNN4 I3JNN4_ORENI<br>sp P00450 CERU_HUMAN | 121  | YSAH  | PH   | GL  | NY | TK    | GN    | EG    | AL    | YD    | GT    | GP    | EL    | KR    | DD    | SV    | AP    | GT    | VT    | YEW   | TL    | AE    | SH    | GP    | TS    | HD    | SN | CM |    |
|                                                | 117  | YIFH  | SH   | GI  | TY | YK    | EH    | EG    | AL    | YD    | NT    | TD    | FQ    | RA    | DD    | KV    | YF    | GE    | QY    | TY    | ML    | LA    | TE    | QS    | PG    | EG    | DN | CV |    |
| tr I3JNN4 I3JNN4_ORENI<br>sp P00450 CERU_HUMAN | 181  | RFYH  | SH   | VSP | PK | DI    | NS    | GL    | IG    | PL    | IV    | CK    | RT    | GL    | LD    | LHG   | SS    | GD    | YQ    | VA    | LL    | FM    | VS    | DEN   | FS    | WY    | LD | EN |    |
|                                                | 177  | RIYH  | SH   | ID  | AP | PK    | DI    | AS    | GL    | IG    | PL    | IV    | CK    | KS    | LD    | KE    | KE    | KHI   | DRE   | FV    | VM    | SV    | V     | DEN   | FS    | WY    | LD | EN |    |
| tr I3JNN4 I3JNN4_ORENI<br>sp P00450 CERU_HUMAN | 241  | RTYI  | TNP  | ARN | LK | ED    | ED    | FI    | ES    | NKM   | HG    | IN    | GL    | YGN   | LR    | CL    | SM    | CQ    | GN    | KI    | QW    | HL    | FA    | LG    | NE    | VD    | MH | SH |    |
|                                                | 237  | KTYC  | SE   | PE  | KV | DK    | ND    | ED    | FE    | SN    | RM    | YS    | VN    | GY    | TE    | GS    | LP    | GL    | SM    | C     | AE    | D     | RV    | KW    | YF    | LG    | MN | EV | DV |
| tr I3JNN4 I3JNN4_ORENI<br>sp P00450 CERU_HUMAN | 301  | VHFG  | QILT | MN  | HT | DT    | IS    | LF    | PA    | S     | TT    | A     | M     | V     | A     | D     | N     | P     | G     | H     | W     | L     | L     | C     | S     | V     | N  | D  |    |
|                                                | 297  | AFHG  | QALT | NK  | NY | RI    | DT    | IN    | LF    | PA    | L     | F     | D     | A     | Y     | M     | V     | A     | Q     | N     | P     | G     | E     | W     | M     | L     | S  | C  |    |
| tr I3JNN4 I3JNN4_ORENI<br>sp P00450 CERU_HUMAN | 361  | CFPN  | VHK  | PR  | PH | G     | E     | L     | R     | O     | Y     | F     | I     | A     | A     | E     | E     | V     | W     | D     | Y     | A     | P     | T     | ..... | V     | P  | T  |    |
|                                                | 357  | CNK   | SS   | KD  | N  | I     | R     | G     | K     | H     | V     | R     | Y     | I     | A     | A     | E     | E     | I     | W     | N     | Y     | A     | P     | S     | ..... | G  | I  |    |
| tr I3JNN4 I3JNN4_ORENI<br>sp P00450 CERU_HUMAN | 410  | GSR   | YK   | V   | R  | Y     | E     | Y     | T     | D     | N     | T     | E     | M     | T     | K     | I     | L     | R     | S     | P     | E     | E     | Q     | H     | L     | G  | I  |    |
|                                                | 417  | GGS   | YK   | L   | V  | R     | E     | Y     | T     | D     | A     | S     | T     | N     | R     | K     | B     | R     | G     | S     | P     | E     | E     | Q     | H     | L     | G  | I  |    |
| tr I3JNN4 I3JNN4_ORENI<br>sp P00450 CERU_HUMAN | 470  | PHGV  | QYS  | VE  | QD | GT    | LY    | H     | N     | E     | L     | E     | S     | Y     | T     | D     | K     | L     | R     | E     | L     | K     | R     | L     | P     | R     | V  | T  |    |
|                                                | 477  | PIGV  | R    | F   | N  | K     | N     | B     | G     | T     | Y     | S     | P     | N     | Y     | N     | P     | ..... | Q     | S     | R     | S     | V     | P     | P     | S     | A  |    |    |
| tr I3JNN4 I3JNN4_ORENI<br>sp P00450 CERU_HUMAN | 530  | GAGP  | VE   | GE  | AD | CL    | TY    | LY    | SA    | VD    | PK    | DS    | SG    | LV    | GP    | LL    | IC    | RP    | KL    | KG    | V     | Q     | N     | Y     | N     | K     | E  |    |    |
|                                                | 524  | E     | V    | GP  | T  | N     | A     | D     | P     | V     | CL    | A     | K     | M     | Y     | S     | A     | V     | D     | P     | K     | D     | I     | F     | T     | GL    | I  |    |    |
| tr I3JNN4 I3JNN4_ORENI<br>sp P00450 CERU_HUMAN | 589  | VFDEN | L    | SW  | L  | D     | N     | I     | R     | T     | F     | T     | A     | P     | N     | T     | V     | N     | K     | E     | D     | E     | G     | F     | I     | E     | S  |    |    |
|                                                | 584  | VFDEN | E    | S   | L  | L     | E     | D     | N     | I     | R     | M     | F     | T     | T     | A     | P     | D     | V     | D     | K     | E     | D     | E     | D     | F     | Q  |    |    |
| tr I3JNN4 I3JNN4_ORENI<br>sp P00450 CERU_HUMAN | 649  | WHL   | S    | G   | L  | G     | S     | E     | T     | D     | I     | I     | S     | L     | Y     | F     | O     | G     | N     | R     | F     | I     | Y     | E     | Q     | N     | R  |    |    |
|                                                | 644  | WYLF  | S    | A   | G  | N     | E     | A     | D     | V     | H     | G     | I     | Y     | F     | S     | G     | N     | T     | Y     | L     | W     | R     | G     | E     | R     | R  |    |    |
| tr I3JNN4 I3JNN4_ORENI<br>sp P00450 CERU_HUMAN | 709  | HYRN  | G    | M   | R  | A     | N     | Y     | T     | V     | E     | K     | C     | S     | I     | L     | H     | R     | Q     | S     | E     | M     | M     | L     | H     | S     | K  |    |    |
|                                                | 704  | HYTG  | G    | M   | K  | Q     | K     | Y     | T     | V     | N     | Q     | C     | R     | R     | Q     | S     | E     | D     | S     | T     | F     | Y     | L     | G     | E     |    |    |    |
| tr I3JNN4 I3JNN4_ORENI<br>sp P00450 CERU_HUMAN | 769  | P     | I    | F   | L  | D     | K     | Q     | G     | G     | F     | I     | G     | S     | R     | Y     | K     | K     | V     | V     | Y     | R     | O     | F     | T     | S     | D  |    |    |
|                                                | 764  | SN    | A    | F   | L  | D     | K     | G     | E     | F     | Y     | I     | G     | S     | K     | Y     | K     | K     | V     | V     | Y     | R     | O     | F     | T     | S     | D  |    |    |
| tr I3JNN4 I3JNN4_ORENI<br>sp P00450 CERU_HUMAN | 828  | FKNM  | A    | T   | R  | P     | Y     | S     | I     | H     | A     | G     | V     | K     | T     | E     | N     | S     | P     | S     | V     | H     | Q     | T     | P     | G     | E  |    |    |
|                                                | 824  | FKNM  | A    | T   | R  | P     | Y     | S     | I     | H     | A     | G     | V     | Q     | T     | E     | S     | T     | V     | T     | P     | T     | L     | P     | G     | E     | T  |    |    |
| tr I3JNN4 I3JNN4_ORENI<br>sp P00450 CERU_HUMAN | 888  | DVA   | K    | D   | L  | S     | G     | L     | I     | G     | L     | P     | V     | V     | C     | R     | R     | S     | W     | G     | R     | T     | L     | G     | L     | K     | E  |    |    |
|                                                | 884  | DQV   | K    | D   | L  | S     | G     | L     | I     | G     | L     | P     | V     | V     | C     | R     | R     | P     | Y     | L     | K     | V     | F     | N     | P     | R     | R  |    |    |
| tr I3JNN4 I3JNN4_ORENI<br>sp P00450 CERU_HUMAN | 948  | RP    | N    | L   | K  | D     | E     | D     | F     | I     | E     | S     | N     | K     | M     | H     | A     | I     | N     | G     | Y     | V     | Y     | G     | N     | L     | N  |    |    |
|                                                | 943  | E     | K    | V   | N  | K     | D     | E     | E     | F     | I     | E     | S     | N     | K     | M     | H     | A     | I     | N     | G     | R     | M     | F     | G     | N     | L  |    |    |
| tr I3JNN4 I3JNN4_ORENI<br>sp P00450 CERU_HUMAN | 1008 | VE    | Y    | K   | L  | G     | G     | A     | H     | R     | A     | D     | V     | Y     | E     | L     | F     | F     | A     | T     | F     | O     | T     | V     | K     | M     | R  |    |    |
|                                                | 1003 | F     | Q    | Y   | K  | H     | R     | G     | V     | Y     | S     | S     | D     | V     | E     | D     | I     | F     | F     | G     | T     | Y     | O     | T     | L     | E     |    |    |    |
| tr I3JNN4 I3JNN4_ORENI<br>sp P00450 CERU_HUMAN | 1068 | K     | S    | G   | I  | F     | G     | ..... | V     | P     | T     | D     | G     | A     | E     | T     | F     | V     | T     | R     | ..... | F     | E     | Q     | N     | R     |    |    |    |
|                                                | 1062 | T     | K    | S   | G  | ..... | ..... | ..... | ..... | ..... | ..... | ..... | ..... | ..... | ..... | ..... | ..... | ..... | ..... | ..... | ..... | ..... | ..... | ..... | ..... | ..... |    |    |    |

**Figure XI.** Structural comparison of the ceruloplasmin between *Oreochromis niloticus* and *Homo sapiens*. The FASTA files related to tilapia and human proteins were acquired on the UNIPROT search platform (<http://www.uniprot.org>).

|                                                |      |       |      |                                                                                                                                        |
|------------------------------------------------|------|-------|------|----------------------------------------------------------------------------------------------------------------------------------------|
| tr Q6P3G1 Q6P3G1_DANRE<br>sp P00450 CERU_HUMAN | 1    | MKG   | 1    | MKGLQFALGLGLVLCAGIASSITREYFFAIKEIQWDYAPSGKNLIQNKIVQQDEAARVFE                                                                           |
|                                                |      |       |      | .MKLILILGLIFLFCSTPAWAKEKHYYIGIIEITWDYAS..DHGEKKLISVDTEHSNLYEC                                                                          |
| tr Q6P3G1 Q6P3G1_DANRE<br>sp P00450 CERU_HUMAN | 61   | RGE   | 58   | RGERIGRVYKKAIVYHQYTDATYRQEIIDKPKWLGVLGPLISAEEDDTVIVHLKNMARRAY<br>NGPDRIGRLYKKAALYLYQYDTETRTTEIKPVLWGLGPIIKAEATGDKVYVHLKNLASRPY         |
| tr Q6P3G1 Q6P3G1_DANRE<br>sp P00450 CERU_HUMAN | 121  | SLHA  | 118  | SLHAGCLSYNKTNEGALYPDSSEKVEKHDDSVAPGTFETTYIWTLPASHAPGKDDTNCITFR<br>TFHSHGITYYKHEGALYPDNITDFQRADDKVPYGEQYTYMLLAITEEQSPGEGDGNCVTR         |
| tr Q6P3G1 Q6P3G1_DANRE<br>sp P00450 CERU_HUMAN | 181  | IYHSH | 178  | IYHSHVNA PKDIASGLIGPLIVCKKGSLDVHGDKTDGDLTYTLMFTVSDENLSWYLEDENIK<br>IYHSHIDAPKDIASGLIGPLIVCKKDSLDKKEKEDI DREYVVMFSSVDENFWSYLEDENIK      |
| tr Q6P3G1 Q6P3G1_DANRE<br>sp P00450 CERU_HUMAN | 241  | TYCSA | 238  | TYCSAPAKVNDKDEAFQESNKMHSINGYVYGNLPDLSCIGNKIHWHLFGMGNEVDIHSAA<br>TYCSBPEKVDKDNEDAFQESNRMYSVNGYTFGSLPGLSCAEDRVKKYVFGMGNEVDVHAA           |
| tr Q6P3G1 Q6P3G1_DANRE<br>sp P00450 CERU_HUMAN | 301  | FFHGO | 298  | FFHGOILTDKROHVDTVSLFPATFVNVEEMVADNPGQWLLSCQVNDHLIAGMQAFFEIKKQ<br>FFHGOALTNKNYRIDTINLFPATLFDAYMVAONPGEWMLSCQNLNLHLKAGLOAFFQVQBC         |
| tr Q6P3G1 Q6P3G1_DANRE<br>sp P00450 CERU_HUMAN | 361  | FPNVH | 358  | FPNVHKPRPFG.EVROYYIAAEEIIVDYGPTIINQYTMKKLVDDIVS.DTFFDNRNDRIG<br>NKSSSKDNIRCKHVRYYIAAEEIIVNVAESGIDITKENLTAPGSDSAVFFEQGTTRIG             |
| tr Q6P3G1 Q6P3G1_DANRE<br>sp P00450 CERU_HUMAN | 419  | GKYKK | 418  | GKYKKVQYVEYTDFTFKRKEKTPPEQHLGILGPVIRAEEDDTIKVTFRNKASRPFSTIOF<br>GSYKKLVYREYTDASFTNRKERGPEEHLGILGPVIWAEEVGDITIKVTFHNKAYPLSIOE           |
| tr Q6P3G1 Q6P3G1_DANRE<br>sp P00450 CERU_HUMAN | 479  | HGVQ  | 478  | HGVQYNIDMDGTLVHNVLEESYTDKLLRELKKQPRVIEEPLAAMVFPDTPYKVEWVVPKD<br>IGVRENKNNEGTYYS.....PNYNPQSRSVPEPSASHVAPTEETIYEWVVPKE                  |
| tr Q6P3G1 Q6P3G1_DANRE<br>sp P00450 CERU_HUMAN | 539  | GPT   | 525  | GPTTEKDPDCLTYLYYSAVDPIRDINSGLVGPILLICKPKTLKS.GKQKNVDKEFHLLATV<br>VPTNADPVCIAKMYSAVDPIRDI FTGLGPMKICKKGSLEHANGROKDV DKEFYLFPTV          |
| tr Q6P3G1 Q6P3G1_DANRE<br>sp P00450 CERU_HUMAN | 598  | FDENL | 585  | FDENLSWYLDNINRYAKQPKSVNKEDADFOESNKMHSINGMYGNLKGILNMCCKGDKVSW<br>FDENBSLLELDNIRMTTAPDQVDKEDDFQESNKMHSMNGEYMGNQPLTMCKGDSVWV              |
| tr Q6P3G1 Q6P3G1_DANRE<br>sp P00450 CERU_HUMAN | 658  | HLSG  | 645  | HLSGLGSETDTHGLYFEGNRFLYKETE RRD TINVFP HI SHTVIMEPDSMGQFEVNC KTTDH<br>YLFSAAGNEADVHGIIYFSGNTYLRWGERRRDTANLFPQTSLTLHMWPDTEGTFNVECLTTDH  |
| tr Q6P3G1 Q6P3G1_DANRE<br>sp P00450 CERU_HUMAN | 718  | YHGM  | 705  | YHGMRYAN YTV EKCRFWNRQSE TMLHQKKYYIAAVEMDWDYSPTRTWE D KMHNGLKE SPG<br>YTGMKQKYTVNQCRQSESDSTFYLGERTYYIAAVEVEWDYSPQREWEKELHHLQEQNVS      |
| tr Q6P3G1 Q6P3G1_DANRE<br>sp P00450 CERU_HUMAN | 778  | NEFL  | 765  | NEFLKKEGKFI GSKYKVVLYKE YTD EFTKLKERTADMEHLGIMGPMIHGKVGKVKIIF<br>NAFLDKGEFYIGSKYKVVYRQYTDSTFRVPPERKAE EHLGILGPQLHADVGDKVKIIF           |
| tr Q6P3G1 Q6P3G1_DANRE<br>sp P00450 CERU_HUMAN | 838  | KNMA  | 825  | KNMARPYSIHAGVKTDSPQVALTRPGETQTYTWYLPKNSPTEEQEECSVGAAYSTVD<br>KNMARPYSIHAGVQTESSIVTFTLPGETLTYVWKLIPERSAGTEDSACIPWAYSTVD                 |
| tr Q6P3G1 Q6P3G1_DANRE<br>sp P00450 CERU_HUMAN | 898  | VIKD  | 885  | VIKDMYSGLVGPIVICKKSLARTLGLKKEVEEFALLFMVFDENESWYLEENIKTHVKNP<br>QVKDLYSGLIGPLIVCRPYLKVFNPR.RKLEFALLLVFDENESWYLEDENIKTYSDDHPE            |
| tr Q6P3G1 Q6P3G1_DANRE<br>sp P00450 CERU_HUMAN | 958  | KALT  | 944  | KALTE DQQFIESNKMHGINGLVFGNLKGLNMMKVGDKVYWYLMGLGNEVDIHTAHFHGHSF<br>KVNKDD EEFIESNKMHAINGRMFGNLQGLTMHVGDVWNWYLMGMGNEVDLHTVHFHGHFS        |
| tr Q6P3G1 Q6P3G1_DANRE<br>sp P00450 CERU_HUMAN | 1018 | DYK   | 1004 | DYKVS GTHRA DVFDLVPGTFQTVTMRPLYS GTWLLHCHVTDHI QAGMETTYTVLEK DGRK<br>QYKHRGVYS DVFDLFPGTYQTL E MFRPTPGI WLLHCHVTDHI HAGMETTYTVLQNE DTK |
| tr Q6P3G1 Q6P3G1_DANRE<br>sp P00450 CERU_HUMAN | 1078 | RG    | 1064 | RGFLGIFGSG<br>SG.....                                                                                                                  |

**Figure XII.** Structural comparison of the ceruloplasmin between *Danio rerio* and *Homo sapiens*. The FASTA files related to zebrafish and human proteins were acquired on the UNIPROT search platform (<http://www.uniprot.org>).

|                      |      |                                                                |
|----------------------|------|----------------------------------------------------------------|
| sp P13635 CERU_RAT   | 1    | MKFLLSALFLHSSLANTREKHYIIGITEAVWDYASGSBEKEELISVDTEQSNFYLRNGP    |
| sp P00450 CERU_HUMAN | 1    | MKILLLGLIFLFCSTPAWAKKHYIIGIETETWDYASDHGKELISVDTEHSNLYLQNGP     |
| sp P13635 CERU_RAT   | 61   | DRIGRKYKKALYSEYTDGTFKTIIDKPAWLGFLGPVIKAEVGDKVSVHVKNFASRPYTFH   |
| sp P00450 CERU_HUMAN | 61   | DRIGRLYKKALYLQYDERTTIEKPVWLGFLGPIIKAEVGDKVSVHVKNFASRPYTFH      |
| sp P13635 CERU_RAT   | 121  | AHGVTYTKANEGAIYPDNTDFQRADDKLFPGOYLYVLRANEP.SPGEGDSNCVTRIIYH    |
| sp P00450 CERU_HUMAN | 121  | SHGITYYKEHEGAIYPDNTDFQRADDKVYPCGOYTYMLLATEEQSPGEGDGNVCVTRIIYH  |
| sp P13635 CERU_RAT   | 180  | SHVDAPKDIASGLIGPLIICKKGSLSHKEKENIDQEFVLMFSVVDENLSWYLEDNIKTFEC  |
| sp P00450 CERU_HUMAN | 181  | SHVDAPKDIASGLIGPLIICKKDSLDSHKEKHIDREFVLMFSVVDENLSWYLEDNIKTYEC  |
| sp P13635 CERU_RAT   | 240  | SEPEKVDKDNEDFQESNRMYSINGYTFGSLPGLSMCAEDRVKWLFLFGMGNEVDVHSELFFH |
| sp P00450 CERU_HUMAN | 241  | SEPEKVDKDNEDFQESNRMYSVNGYTFGSLPGLSMCAEDRVKWLFLFGMGNEVDVHAFFH   |
| sp P13635 CERU_RAT   | 300  | GOALTSKNYHTDIINLFPATLIDVSMVAQNPGVWMLSCQNLNHLKAGLQAFFQVRDCNKP   |
| sp P00450 CERU_HUMAN | 301  | GOALTNKNYRIDTINLFPATLFDAYSVAQNPGVWMLSCQNLNHLKAGLQAFFQVQECNKS   |
| sp P13635 CERU_RAT   | 360  | SPDDDIQDRHVRHYIAAEEIWDYAPSGTIDFTGENFTSLGSDSRVFFEQGATRIGGSY     |
| sp P00450 CERU_HUMAN | 361  | SKNDNIRGKHVRHYIAAEEIWNYAPSGIDFTKENLTAPEGSDSRVFFEQGATRIGGSY     |
| sp P13635 CERU_RAT   | 420  | KKLVYREYTDASFTNRKERGPEEEHLGILGPVIWAEVGDITRVTFHNKQFPLSTQPMGV    |
| sp P00450 CERU_HUMAN | 421  | KKLVYREYTDASFTNRKERGPEEEHLGILGPVIWAEVGDITRVTFHNKQAYPLSTEPIGV   |
| sp P13635 CERU_RAT   | 480  | RFTRKNEGTYGPDGRSSKQ.....ASHVAPKETFTYEWTVPKEMGPTYADPVCLSKMY     |
| sp P00450 CERU_HUMAN | 481  | RFTRKNEGTYGPNYNPSSRSVPPASHVAPETFTYEWTVPKEVGTNADPVCLAKMY        |
| sp P13635 CERU_RAT   | 535  | SGVDLTKDIFTGLIGPMKICKKGSLLADGROKQVDVDFEYLFATVFDENESLLLDDNIRMF  |
| sp P00450 CERU_HUMAN | 541  | SAVDPTKDIFTGLIGPMKICKKGSLLHANGROKQVDVDFEYLFATVFDENESLLLDDNIRMF |
| sp P13635 CERU_RAT   | 595  | TTAPENVDKEDDFQESNKMHSNMGFMYGNLPLGNMCLGESSIVWYLFVSAGNEADVHGIYF  |
| sp P00450 CERU_HUMAN | 601  | TTAPDQVDKEDDFQESNKMHSNMGFMYGNQPLGTMCKGESSIVWYLFVSAGNEADVHGIYF  |
| sp P13635 CERU_RAT   | 655  | SGNTYLSKGERRDANLFFHKSLTLLMTPDTEGSDFNVECLTTDHYTGGMKQKYTVNQCKG   |
| sp P00450 CERU_HUMAN | 661  | SGNTYLRGERRDANLFFQTSLTLLHWPDTEGTFNVECLTTDHYTGGMKQKYTVNQCR      |
| sp P13635 CERU_RAT   | 715  | QPEDVTLVCGERTYYIAAVEVEWDYSPRRWEKELHHLQEQNVSNAPFLDKGEFFIGSKYK   |
| sp P00450 CERU_HUMAN | 721  | QSEDSTFYCGERTYYIAAVEVEWDYSPRRWEKELHHLQEQNVSNAPFLDKGEFFIGSKYK   |
| sp P13635 CERU_RAT   | 775  | KVYREFTDSTFRVVRRAEEHLGLLGPQIHADVGAKVKVVFKNMATRPYSIAHAGVK       |
| sp P00450 CERU_HUMAN | 781  | KVYRQYTDSTFRVVRRAEEHLGLLGPQIHADVGAKVKVVFKNMATRPYSIAHAGVQ       |
| sp P13635 CERU_RAT   | 835  | TKSSTVAPTLPGEVRTYHWKIPERSGAGTEDSPCIPWAYYSTVDKVKDLYSGLIGPLIVC   |
| sp P00450 CERU_HUMAN | 841  | TKSSTVTPTLPGETLTYHWKIPERSGAGTEDSPCIPWAYYSTVDKVKDLYSGLIGPLIVC   |
| sp P13635 CERU_RAT   | 895  | RKSYVKVFNPKKKMEFSLFLVFDENESWYLDNINITYSDHPEKDNKDEEFIESNKMHA     |
| sp P00450 CERU_HUMAN | 901  | RRTYLKVFNPKRKKLEFSLFLVFDENESWYLDNINITYSDHPEKVNKDEEFIESNKMHA    |
| sp P13635 CERU_RAT   | 955  | INCRMFGNLQGLTMRVGVDEVNWWYVMMGMNEIDLHTVHFHGHSPQYKHRGTHSSDVFDLFF |
| sp P00450 CERU_HUMAN | 961  | INCRMFGNLQGLTMRVGVDEVNWWYVMMGMNEIDLHTVHFHGHSPQYKHRGTHSSDVFDLFF |
| sp P13635 CERU_RAT   | 1015 | GTYTLEMPFQTPGILLHCHVTDHIHAGMVTYTVLQNEETKSG                     |
| sp P00450 CERU_HUMAN | 1021 | GTYTLEMPFQTPGILLHCHVTDHIHAGMVTYTVLQNEETKSG                     |

**Figure XIII.** Structural comparison of the ceruloplasmin between *Rattus norvegicus* and *Homo sapiens*. The FASTA files related to rodent and human proteins were acquired on the UNIPROT search platform (<http://www.uniprot.org>).





|                      |      |                                                          |                                 |
|----------------------|------|----------------------------------------------------------|---------------------------------|
| sp Q61147 CERU_MOUSE | 1    | MKFLIISTFIFLYSSLALARDKHVFIGITEAVWDYASGTE                 | EKKLISVDTEQSNFYLQNGP            |
| sp P00450 CERU_HUMAN | 1    | MKILLIGIFLFLCSIPAWAKEKHVYIGIETTDWYASDHG                  | EKKLISVDTEHSNIYLQNGP            |
| sp Q61147 CERU_MOUSE | 61   | DRIGRKYKKALYFEYTDCTFSKTIKPAWLGFLGPVIKAEVE                | DKVYVHLKLNLSRIYTFH              |
| sp P00450 CERU_HUMAN | 61   | DRIGRLYKKALYLQYTDCTFRRTTIKPVWLGFLGPIIKAE                 | TGDKVYVHLKLNLSRPIYTFH           |
| sp Q61147 CERU_MOUSE | 121  | AHGVTYTKYEAGAVYPDNTTDFORADDKVLPGQYVYVLLHANE              | PSPGEGDSNCVTRIYH                |
| sp P00450 CERU_HUMAN | 121  | SHGLTYYKEHEGAHYPDNTTDFORADDKVPGEQYTYMLLATEEQ             | SPGEGDGNVTRIYH                  |
| sp Q61147 CERU_MOUSE | 180  | SHVDAPKDIASGLIGPLIICCKGSLYKEKEKNIDQEFVLMFSVVDEN          | LSWYLEDNIKTEC                   |
| sp P00450 CERU_HUMAN | 181  | SHLDAPKDIASGLIGPLIICCKDSLDEKEKEKIDREFVLMFSVVDEN          | FWSWYLEDNIKTYC                  |
| sp Q61147 CERU_MOUSE | 240  | SEPEKVDKDNEDFQESNRMYSINGYTFGSLPGLSMCAADR                 | RVKWFYFGMGNEVDVHSAFFH           |
| sp P00450 CERU_HUMAN | 241  | SEPEKVDKDNEDFQESNRMYSVNGYTFGSLPGLSMCAE                   | DRVWYFGLMGNEVDVHAAFFH           |
| sp Q61147 CERU_MOUSE | 300  | GOALTSRNYQTDIINLFPATLIIDAYMVAQNPGVWMLSCQNLNHLKAGLQAFFQV  | RDCNKP                          |
| sp P00450 CERU_HUMAN | 301  | GOALTNNKYRIDTINLFPATLIDAYMVAQNPGVWMLSCQNLNHLKAGLQAFFQV   | QECNKS                          |
| sp Q61147 CERU_MOUSE | 360  | SPEQNIQDRHVRHYIAAEEVIWNYAPSGTDIFTGENLTALESDS             | RVFFEQGATRIGGSY                 |
| sp P00450 CERU_HUMAN | 361  | SKDNIRGKHVRHYIAAEEIWIWNYAPSGIDIFTKENLTALESDS             | RVFFEQGATRIGGSY                 |
| sp Q61147 CERU_MOUSE | 420  | KKMAYREYTDGSFTNRKRGPEDEEHLGILGPVIWAEVGDITK               | RVTFHNKQHPLESIQPMGV             |
| sp P00450 CERU_HUMAN | 421  | KKLVYREYTDASFTNRKRGPEDEEHLGILGPVIWAEVGDITR               | RVTFHNKQAYPLESIEPIGV            |
| sp Q61147 CERU_MOUSE | 480  | SFTAENEGTYYG...PGRSSQQAASHVAPKETFTYEWTVPKEM              | GPTYADPVLCKMY                   |
| sp P00450 CERU_HUMAN | 481  | RFNKNNEGTYYSENYNPQRSVPPSASHVAPKETFTYEWTVPKEM             | GPTYADPVLCKMY                   |
| sp Q61147 CERU_MOUSE | 536  | SGVDPTKIDFTGLIGPMKICKKGSLLADGRQKDVDFEYLFPTVFDENESLL      | LDNIRMF                         |
| sp P00450 CERU_HUMAN | 541  | SAVDPTKIDFTGLIGPMKICKKGSLLANGRQKDVDFEYLFPTVFDENESLL      | LDNIRMF                         |
| sp Q61147 CERU_MOUSE | 596  | TTAPDQVDKEDDFQESNKMHSNMGFMYGNQPLNMC                      | LGEISIVWYLFSAAGNEADVHG          |
| sp P00450 CERU_HUMAN | 601  | TTAPDQVDKEDDFQESNKMHSNMGFMYGNQPLTMC                      | RGSISVWYLFSAAGNEADVHG           |
| sp Q61147 CERU_MOUSE | 656  | SGNTYLSKGERRDANLFRHKSLTLDMNPDTKGTFDVECLTTDHYTGGMKQKYTVNQ | QR                              |
| sp P00450 CERU_HUMAN | 661  | SGNTYLRKGERRDANLFRQTSLTLHMWPDTEGTFNVECLTTDHYTGGMKQKYTVNQ | RR                              |
| sp Q61147 CERU_MOUSE | 716  | QFEDFTVYLGERTYYVAAVEVEWDYSPSRANEKELHHLQEONVSNV           | FLDKREFFIGSKYK                  |
| sp P00450 CERU_HUMAN | 721  | QSEDSTFYLGERTYYVAAVEVEWDYSPORANEKELHHLQEONVSNV           | FLDKREFFIGSKYK                  |
| sp Q61147 CERU_MOUSE | 776  | KVVYRQFTDSSFRVQVRRRAEDELHLGILGPPIHANVGDVKVVF             | FKNMATRPYSIHAGVK                |
| sp P00450 CERU_HUMAN | 781  | KVVYRQYTDSTFRVVPVRRRAEDELHLGILGPPIHADVGDVKVVI            | IFKNMATRPYSIHAGVQ               |
| sp Q61147 CERU_MOUSE | 836  | TESSTVPTLPGEVRYTYTWQIPERSGAGR                            | EDSACIPWAYYSTVDQVKDLYSGLIGPLIVC |
| sp P00450 CERU_HUMAN | 841  | TESSTVPTLPGETLTYTWQIPERSGAGT                             | EDSACIPWAYYSTVDQVKDLYSGLIGPLIVC |
| sp Q61147 CERU_MOUSE | 896  | RKSYVYKVFSPKPKMEFLLFLVFDENESWYLDNIIKTYSDH                | HPKVNKNDNEEFESNKMHA             |
| sp P00450 CERU_HUMAN | 901  | RRPYLKVFNPRRKLEFALLFLVFDENESWYLDNIIKTYSDH                | HPKVNKNDNEEFESNKMHA             |
| sp Q61147 CERU_MOUSE | 956  | INGRMFGNLQGLTMHVKDEVNWMGMGNEIDLHTVHFHGHFSFQYK            | HGRGVYSSDVFDLFP                 |
| sp P00450 CERU_HUMAN | 961  | INGRMFGNLQGLTMHVGDEVNWMGMGNEIDLHTVHFHGHFSFQYK            | HGRGVYSSDVFDLFP                 |
| sp Q61147 CERU_MOUSE | 1016 | GTYTLEMFQTPGTWLLHCHVTDHVGAGMATTYTVLPVEQETKSG             |                                 |
| sp P00450 CERU_HUMAN | 1021 | GTYTLEMFRTPGTWLLHCHVTDHVGAGMETTYTVLQNEETKSG              |                                 |

**Figure XIV.** Structural comparison of the ceruloplasmin between *Mus musculus* and *Homo sapiens*. The FASTA files related to rodent and human proteins were acquired on the UNIPROT search platform (<http://www.uniprot.org>).

|                                               |      |                                                                |      |                                                                  |
|-----------------------------------------------|------|----------------------------------------------------------------|------|------------------------------------------------------------------|
| tr I3KHS6 I3KHS6_ORENI<br>sp P01024 CO3_HUMAN | 1    | .RTRLWLLASLAFLSLTFITDGSMPKVMASAPNLLGVGTAAQNIQVECDCTDES DLMVEIT | 1    | MGPTSGPSLLLHLTLHLALGSPMYSITIPNILLRLESEEEMVLEAHDAQG..DUPVTVT      |
| tr I3KHS6 I3KHS6_ORENI<br>sp P01024 CO3_HUMAN | 60   | VMSYPTKSKRLISTSVNLTSANKFQAFGQIKIPT.EGFSRDPQRKQVYVLAQAFPDDVKLE  | 59   | VHDEPCKKLVLSSEKTVLTPATINHMGNVITFTIPANREFKSEKGRNKVEVTVQVVE        |
| tr I3KHS6 I3KHS6_ORENI<br>sp P01024 CO3_HUMAN | 119  | KIVLVSFHSGYFIQTDKTIYTPNSKVHYRFFALTPNMEPVERDNSTISDTVAIQFVNP     | 119  | KVVLVSLQSGYEFIQTDKTIYTPNSTVLYRFFALTPNMEPVERDNSTISDTVAIQFVNP      |
| tr I3KHS6 I3KHS6_ORENI<br>sp P01024 CO3_HUMAN | 179  | EGVIFPPLDTSVKS.S.GIHSGHFQINEIVSTGLWKMMSFQSKPQLSVSAEFEVKKDYVLP  | 171  | EGIPVKQDLSLSQNLGLVLP LSLWIDIPELVNMGQWKIRAYIENSFQQVPSSTEFVKKDYVLP |
| tr I3KHS6 I3KHS6_ORENI<br>sp P01024 CO3_HUMAN | 237  | NFEVKLTNENPFYVDSD.E.LTINI KATYLFGEVDSGSAFVFGVHLHQDKTINFAQLSLOK | 231  | SFEVTVPETEKRYIYNEKGLVETITARFLMGKKVBTAFVIFGIQDGBQRIISLPESLKR      |
| tr I3KHS6 I3KHS6_ORENI<br>sp P01024 CO3_HUMAN | 296  | VSIENCGVTITKKEHIIKQTFEN..ISSLVGSIFAAVNVLTDSGSEMAEAELETCIQIVT   | 291  | IPIEDGSGEVVLSRKLKGLDGVQNPRAEDLVGKSLYVSAATVILHSGSDMVAERSGTIVT     |
| tr I3KHS6 I3KHS6_ORENI<br>sp P01024 CO3_HUMAN | 354  | SPYTIHFKKTSRFYFKPGMSFDVVEVLNPDGSPAQCQAVMIDPQD.VOGFTAAANGMARLT  | 351  | SPYQIHFTKTPRYFKPGMSFDLMVFEVLPDGPSPARVAVVQGEDVQGLTQDGMVAKLS       |
| tr I3KHS6 I3KHS6_ORENI<br>sp P01024 CO3_HUMAN | 413  | INTVNNPQPMKITAKTQVVKISPEROASATMTALPYASQ..SNSYIHIQVDTAEVKNQGN   | 411  | INTHPSQKPLSITVTRTKQELSEAEQATRMOALPYSTVGNSSNYLHLVLRTELRPGET       |
| tr I3KHS6 I3KHS6_ORENI<br>sp P01024 CO3_HUMAN | 471  | MKINIHLSRQ...QNVQNDITYLLSRGQLVKYG.RYRTSGOIMISLITVTKDLPSFR      | 471  | LNVNFLLRMDRAHEAKIRYYTYLIMNKGRLKAGRQVREPQDGLVVL LLSITTDLPSFR      |
| tr I3KHS6 I3KHS6_ORENI<br>sp P01024 CO3_HUMAN | 527  | IIAYYHPN...DNEVSDSVWVDVDETCMGLLQLOS.EGGSRFYEPKIFR LKIGDPE      | 531  | LVAYYTLIGASGQRVAVDSVWVDVKDSCVGLVVKSGQSEDRQPVGGQMT LKIGDHG        |
| tr I3KHS6 I3KHS6_ORENI<br>sp P01024 CO3_HUMAN | 582  | ATVGLVAVDKGVYILNSKHLRTOQKIWDTVENYDTGCTPGGKDSMVFV DAGLTFESNI    | 591  | ARVVLVAVDKGVYILNSKHLRTOQKIWDTVENYDTGCTPGGKDSMVFV DAGLTFESNI      |
| tr I3KHS6 I3KHS6_ORENI<br>sp P01024 CO3_HUMAN | 642  | ASGTPYRQELKCLTPNRRRSVDMNVTTLLSQQYKDKLEHDCCLDGIRETPTSSNCKRR     | 651  | GQQTAAQRAELQCPAARRRRSVQLTEKRMKDKVGYKELRKCCE DGMRENPMRFSCQRR      |
| tr I3KHS6 I3KHS6_ORENI<br>sp P01024 CO3_HUMAN | 702  | SEFITD.TACFEAFLHCCKEMEKRAERKEDGLKLARSEDDDSFSMDSNEIVSRNFPES     | 711  | TRFISLGEACKKVFLDCCNYITELRQHARASHLGLARSNLDEDI IAEENIVSRSBFPES     |
| tr I3KHS6 I3KHS6_ORENI<br>sp P01024 CO3_HUMAN | 761  | WLWSDIKLPACPEENAKCETESVTRNIPLODSITTWETITGISTSKTHGICVGDPLETVVR  | 771  | WLWNVEDLKEPE...KNGISTKLMNIFLKDSITTWETITLAVSMDDKKGICVADPEVTVM     |
| tr I3KHS6 I3KHS6_ORENI<br>sp P01024 CO3_HUMAN | 821  | KDFVVDLKLPSAVRGEQEIKAIVTNNHGN.LYTVRVDL TEAEHFCSAASKRGRYQEM     | 827  | QDFFDLRLPYSVVRNEQEIKAIVTNNHGN.LYTVRVDL TEAEHFCSAASKRGRYQEM       |
| tr I3KHS6 I3KHS6_ORENI<br>sp P01024 CO3_HUMAN | 880  | KVGAKSIRSVSFTIIPTKCQHRITPKAAVKESEISDITVKMLRVVPEGILVKS SHTLTL   | 887  | TIPKSSLSVPIVPLTKGLQEVVKAAYVHHFISDGVKSLRVVPEGIRMNKIVAVRT          |
| tr I3KHS6 I3KHS6_ORENI<br>sp P01024 CO3_HUMAN | 940  | DPKQRDGRQVEILN..SKTPVIDBVPNSPTSTQISLQKQQRNV LKNTISGESMGLIYQ    | 947  | LDPBRDGRQVEIQKEDIPADLSDOVPDTESETRILLOGTTPVAQMTEDAVDAERLKH LIT    |
| tr I3KHS6 I3KHS6_ORENI<br>sp P01024 CO3_HUMAN | 998  | PSGCGENMIHMTLPVIAITYLDRADLWEIVNIDQRHQALQHIITGYHNLQLEYSKKDG SF  | 1007 | PSGCGEQNMIHMTPTVIAIHYLDETEQWEKFGLEKRGQALELKKGYTQQLAFRQPS SAF     |
| tr I3KHS6 I3KHS6_ORENI<br>sp P01024 CO3_HUMAN | 1058 | ARTQDVPSSTWLTAYVVKVFLANLLIAVQSEVICNAVRFLLIINTQPNGMFMEVGSVSH    | 1067 | AAFVKKRAPSTWLTAYVVKVFLANLLIAIDSQVLCGAVKWLILEKQKPDGVFQEDAPVH      |
| tr I3KHS6 I3KHS6_ORENI<br>sp P01024 CO3_HUMAN | 1118 | KEIIGVDLDTDS.DASFVAFCSVMSOESRTICAPTVDHNLQASIDKAVGRLPERRLSLVNP  | 1127 | QEMIGGLRNNNEKDMAITAFV LISHQEAKDICEEQVNSLPGSITKAGDLEANYMHLQRS     |
| tr I3KHS6 I3KHS6_ORENI<br>sp P01024 CO3_HUMAN | 1177 | YAVAITSYAMANENKLNREIFFKFS.S.PDSSYWPABAGR VFTVEATYALLALVRAKAF   | 1187 | YTVAITAGYALAQMGRLKGPLLNKFLTAKDKNRWEDGKQLYNVEATS YALLALVQLKDF     |
| tr I3KHS6 I3KHS6_ORENI<br>sp P01024 CO3_HUMAN | 1235 | DEARPTVRRWFNKQIRENGGYGSAQATMTVYQAIAYWVISE.KEP EYDLNVDILLPGRSKP | 1247 | DFVPPVRRWLNQORYYGGYGSQATFMVROALAQYQKDAPDHQELNLDVSLQLPGRSSK       |
| tr I3KHS6 I3KHS6_ORENI<br>sp P01024 CO3_HUMAN | 1294 | DKYNFNWDNHFAITRTSKINVINQDVKVSAATGPEATLTIITSLYIYELPKKKNCKOKNDS  | 1307 | ITHRIHWESASLRSSEET.KENEGFTVTAEGKQGLTSLVYMYHAKAKDLT.CNKFNDK       |
| tr I3KHS6 I3KHS6_ORENI<br>sp P01024 CO3_HUMAN | 1354 | VQLLEESLG...DDEINIYLNKIKVFKNKNERNATTPVLDIGLLTGFVSTKDLDLQAK     | 1365 | VTIKESAPETERKRPQDARKNTMI LECTRYR.GDQATMSILDSMMTGFPAPD TDLRQLAN   |
| tr I3KHS6 I3KHS6_ORENI<br>sp P01024 CO3_HUMAN | 1409 | GHARTLSKYRLNSES.ERRLTIYLNKVPYT.ELEIAFRVHQKLVGILQPAAVVYVYFES    | 1424 | GVDRYISKYELDKAFSDRNTLIYLDKVSHEDDCLAFKVVHQYFVVELIQGAVKVVYVY       |
| tr I3KHS6 I3KHS6_ORENI<br>sp P01024 CO3_HUMAN | 1467 | DQLQNTKCVRFYHPERKAGELLRLCRNDECICAENCSMOK.KGKINNDERKDKICESTV    | 1484 | NLEES..CTRFYHPEKEDGKLNKLCRDELCRCAEENCIFQKSDDKVTLBERLDKACEP..     |
| tr I3KHS6 I3KHS6_ORENI<br>sp P01024 CO3_HUMAN | 1526 | RSKIDYAYKVSVEQFADGLSTDIYITVQVLEVKEGSYDVGAGQRORTFLGYPHCRMALDL   | 1540 | ..GVDYVYKTRLVKVLQSNDFDEYITMAIEQTIKSGSEVQVGGQORTFLSPICKRBALKL     |
| tr I3KHS6 I3KHS6_ORENI<br>sp P01024 CO3_HUMAN | 1586 | GVGKTEFLMGTSDIFKDEKQSQSYQVYLGERTWIEYWFVTVTECTEEHNSTCSAIDEMVN   | 1597 | EEKKHVLMWGLSSDFWGEKPN..LSYIIGKDTWVEHWEDEECQDEENKQKQDLDGAFTE      |
| tr I3KHS6 I3KHS6_ORENI<br>sp P01024 CO3_HUMAN | 1646 | EYMIKRCRN                                                      | 1655 | SMVVFQCPN                                                        |

**Figure XV.** Structural comparison of the complement C3 between *Oreochromis niloticus* and *Homo sapiens*. The FASTA files related to tilapia and human proteins were acquired on the UNIPROT search platform (<http://www.uniprot.org>).



|                                               |      |                |                                                      |         |
|-----------------------------------------------|------|----------------|------------------------------------------------------|---------|
| tr F1QYN0 F1QYN0_DANRE<br>sp P01024 CO3_HUMAN | 1    | .MHGCLVC       | VAAVILSLPLLSFCQPIYIISAPNKLKIGSAERVFVEAODYAGASLNV     | VRISV   |
|                                               | 1    | MGPTSGPS       | LLLLLLTHLPLDALGSEMYSIITPNILRLSESETEVLEAHDAAQGDVP.    | VTVTV   |
| tr F1QYN0 F1QYN0_DANRE<br>sp P01024 CO3_HUMAN | 60   | RRFKDDQREVAS   | TSVTLTAGKNFQELVEIEVPSN.SFTFDKSAQOYAVLQAOFPNKLLOK     |         |
|                                               | 60   | HDFPGKLLVLS    | SEKTVLTPATNHMGNVFTTIPANREFKSEKGRNKFEVTVQATFSTQVVEK   |         |
| tr F1QYN0 F1QYN0_DANRE<br>sp P01024 CO3_HUMAN | 119  | QILVTFQSGHIV   | LQTDKTIYTPDSTVHYRVFSLSPGMTRPFQSGVRVEILTPDGI          | LESK    |
|                                               | 120  | VLVSLQSGYLV    | IQTDKTIYTPGSTVLYRIFTVN.HKLLPVGRTVMVNIENPBGIPVKQD     |         |
| tr F1QYN0 F1QYN0_DANRE<br>sp P01024 CO3_HUMAN | 179  | SVFPDG..GVVSGT | FTGIDPASPGLWKLVAHKNSPQKNFTSEFEVKEVYVLPSEFVSLSP       |         |
|                                               | 179  | SLSSQNQLGVL    | PLSWDIPLELVNMGQWKIRAYYENSPQVFTSEFEVKEVYVLPSEFVIVBP   |         |
| tr F1QYN0 F1QYN0_DANRE<br>sp P01024 CO3_HUMAN | 237  | HKAFFYVND.D.S  | LLVDIHAHYLFGETVNGHGFVVFVGVTEDEKGRKISIPGSLORVQIWDGS   |         |
|                                               | 239  | TEKFYIYNEKGL   | LEVITARFLMGKKGVTAFVVFVGIQDGEQ.RISIPESLRRIPIDGS       |         |
| tr F1QYN0 F1QYN0_DANRE<br>sp P01024 CO3_HUMAN | 296  | GTAQLTKRQHLQ.  | TFPEITRQLVQKSLYISVSLTESGSEMVAHKKGIHIVTSPYTIYF        |         |
|                                               | 298  | GEVVLRSKVLLD   | GVQNRRAEDLVGKSLYVSATVILHSGSDMVQAERSGIPIVTSPYQIH      |         |
| tr F1QYN0 F1QYN0_DANRE<br>sp P01024 CO3_HUMAN | 354  | KRTPQEFKPGMP   | PDVSVVVTNPDTEPAKNVKEVEV.PGGVSGQTKANKIAKVTINTPGGS     |         |
|                                               | 358  | TKTPKQEFKPGMP  | PDLMVVTNPDGSPAYRVPVAVQGEDTVQSLTQGDGVAKLSINTHPGQ      |         |
| tr F1QYN0 F1QYN0_DANRE<br>sp P01024 CO3_HUMAN | 413  | STLEITARTSDPQ  | LTSRQOAEKRMATAHAYVPKGGSNYLHTGIDAAELRIGDSMKVNLNL      |         |
|                                               | 418  | KPLSITVTRTKKQ  | LEAEQATRLMQLALYVSTVGNSSNYLHTGIDAAELRIGDSMKVNLNL      |         |
| tr F1QYN0 F1QYN0_DANRE<br>sp P01024 CO3_HUMAN | 473  | GQS..PGVVRDQD  | FYMIILSRQIVQANRFKRR.GQILVLSLSPVTKDMVPSFSEVYVYHV      |         |
|                                               | 478  | RMDRAHEAKIRY   | YTYLIMNKGRLKAGRQVREPQDGLVLPSPITDFIPSPFSEVYVYHV       |         |
| tr F1QYN0 F1QYN0_DANRE<br>sp P01024 CO3_HUMAN | 530  | GSS...EVVSDSV  | VVDVKDTCMGSLLKVEVHDP.VEVYEPGEFELELRTGDPGARVGLVA      |         |
|                                               | 538  | IGASQQR        | EVVADSVVDVKDSCMGSLLVVKSGQSEDRQPVPCCQMTLRTGDPGARVGLVA |         |
| tr F1QYN0 F1QYN0_DANRE<br>sp P01024 CO3_HUMAN | 585  | VDKGVVVLNKKH   | RITQSKIWDVVESHDTCAGSGKNSMQVFS DAGLLEFSSSAGGT         | TSVR    |
|                                               | 598  | VDKGVVVLNKKH   | KLTQSKIWDVVEKADIGCTPGSGKDYAGVFS DAGLLEFSSSAGGT       | TAQR    |
| tr F1QYN0 F1QYN0_DANRE<br>sp P01024 CO3_HUMAN | 645  | TNSECPSSSR     | RRKRETLVNLHKTLLDKYSGLARECCV DGLRALDVLDFSCYR          | SFILD   |
|                                               | 658  | AELQCPQPAARR   | RRRSVQLTEKRLMDKVGKYPKELRKCCEDGMR.ENPMPFSCYRRT        | PFISL   |
| tr F1QYN0 F1QYN0_DANRE<br>sp P01024 CO3_HUMAN | 705  | GKECRDAFLDCC   | NRLTSHR.EEPAAEEETFLGRTGEDDEFVNSDDIVSRTLFPESWLWEEV    |         |
|                                               | 717  | GEACKKVFLDCC   | NYITELRQHARASHLGLARSNLDEDIIEENIVSRSEFPESWLWNVE       |         |
| tr F1QYN0 F1QYN0_DANRE<br>sp P01024 CO3_HUMAN | 764  | MLPKCLGNRQC    | TTTLPKDLWLKDSITWEITAEISLNTHGICVADVHEMIVAKNFFID       |         |
|                                               | 777  | DLKEPPKN...    | GISTKLMNIELKDSITWEILAVSMSDKRGICVADPFEVTVMQDFFID      |         |
| tr F1QYN0 F1QYN0_DANRE<br>sp P01024 CO3_HUMAN | 824  | LKIPYSAVRNEQ   | IEIKALIHNLYS.KAVKVRVELKE TKDICS PASNKRGRYAVTVT       | VASKS   |
|                                               | 833  | LRLPYSVVRNEQ   | VEIRAVLYRYRQNEKVRVELLHNPAPFSGLATERRKHQVIT            | IPKKS   |
| tr F1QYN0 F1QYN0_DANRE<br>sp P01024 CO3_HUMAN | 883  | SYVPEVIVPIAL   | GRHATEVKAASGRGN.DGVRKDLVVESEGLT.RKISENLQFNPFK        |         |
|                                               | 893  | SLSVPEVIVPIK   | TGLQVEVKAAYHFFHS.DGVRKSLKVPPEGIRMNQTVAVRILD          | PERL    |
| tr F1QYN0 F1QYN0_DANRE<br>sp P01024 CO3_HUMAN | 941  | GETIVTKQSH..   | ILKQAPNTPSSTYVQAIQDITITIEKATSGAAMGSLIIQPGCGGE        |         |
|                                               | 953  | GREGVQKEDIPP   | ADLSQVPTSETRILLQGTVAQMTEDAVDAERLKHLIQTPSGCGGE        |         |
| tr F1QYN0 F1QYN0_DANRE<br>sp P01024 CO3_HUMAN | 998  | QNMMGHTMPVIA   | THYLDKTNQWHTVRAGLRQATATEYIRKGYNOELAYRKS DGS          | FAAWINR |
|                                               | 1013 | QNMMGHTMPVIA   | VHYLDETEQWEKFGLEKRGALERTKKGYSQQLAFRQPSAFAAEVKR       |         |
| tr F1QYN0 F1QYN0_DANRE<br>sp P01024 CO3_HUMAN | 1058 | PSSTWLTAYVAK   | VAFAMSDIILIDQNVICSA LRWLIMNROLNPGVFR ENAPVIHGE       | MTGN    |
|                                               | 1073 | APSTWLTAYVAK   | VFAVNLIAIDSOVLCGAVKWLILEKQKPDGVFQEDAPVIHGE           | MTGN    |
| tr F1QYN0 F1QYN0_DANRE<br>sp P01024 CO3_HUMAN | 1118 | VQGSNS.EASMTAF | VITLQEGRSRCNGQVSSLDSIYKAIAYLKSQLOGLINPYAVAMA         |         |
|                                               | 1133 | LRNNNEKDMALT   | AFVITLSLOEAKDICEBOVNSLPGSITKAGDFLEANNLQRSYTVATA      |         |
| tr F1QYN0 F1QYN0_DANRE<br>sp P01024 CO3_HUMAN | 1177 | SYALANANSLNKQ  | VLMKAS..ADKSHNPVPGSSFTLEASSYALLALVKLHDYQNTAP         | IF      |
|                                               | 1193 | GYALAQMGRLKGP  | LLNKFLITAKDKNRNEDPGKQLYNVEAFSYALLALLQLKDEDFV         | PBV     |
| tr F1QYN0 F1QYN0_DANRE<br>sp P01024 CO3_HUMAN | 1235 | VNWLNNORQYNG   | GGYGTQATIMVFOVAEYRIHAKNIKQLDLELSIRVEG.VRPTVFTFS      |         |
|                                               | 1253 | VRWLNORQYNG    | GGYGTQATIMVFOALAQYQKADAPDHOELNLDVSLQLPSRSSKITHRIH    |         |
| tr F1QYN0 F1QYN0_DANRE<br>sp P01024 CO3_HUMAN | 1294 | KNNDHLSQTAK    | IPSNKGITISAKGFGEASVTVTVEYAKPKESSTCKNFLELETFE..K      |         |
|                                               | 1313 | WESASLLRS      | EETKENEGFTVTAEGKGGQLSVVTMYHAKAKD.QLTCNKFDLKVITK      | PAP     |
| tr F1QYN0 F1QYN0_DANRE<br>sp P01024 CO3_HUMAN | 1352 | DNEVRYQGATE    | SYKLTINTRYLSADR DATMSILDVSLTGFVDPDENDLKALSTGRDR      | LITIS   |
|                                               | 1372 | ETEKRPODAKNT   | IMILEICTRYR.GDQDATMSILDISMGTGAPDLDLQLANGVDRYI        |         |
| tr F1QYN0 F1QYN0_DANRE<br>sp P01024 CO3_HUMAN | 1412 | KFEMNKQLSBRG   | SLIYLDKISHTRKDRVAFRLHRIMNGGFTOPAGVTVYVEYYSIENRCV     |         |
|                                               | 1431 | KYELDKAFSDRN   | TLIYLDKVSHEDDCLAFKVHQYFNVELTOPGAVVYAYYNLEESC         | T       |
| tr F1QYN0 F1QYN0_DANRE<br>sp P01024 CO3_HUMAN | 1472 | KFYHPTRKEGGL   | OKICRNDVCCAE DNCSIQK.KEKIQEAHRNKKACE SKINVYKAVL      | L       |
|                                               | 1491 | RFYHPEKEDGKL   | NKLCRDELCCAE ENCFIQKSDDKVTLERLDRKACEPGVDVYKTR        | L       |
| tr F1QYN0 F1QYN0_DANRE<br>sp P01024 CO3_HUMAN | 1531 | GQDEDASTVSY    | YMRIOQLKIGPEDDVEGKRRTFTVQISCKEALDLKRGESYLI           | MCQSEB  |
|                                               | 1551 | KVQLSNDFD      | YIMALEQTIKSGSEVQVQQRTEISPIKCREALKLEKKHYLWGLSS        | D       |
| tr F1QYN0 F1QYN0_DANRE<br>sp P01024 CO3_HUMAN | 1591 | VQLEGGKVGQY    | ALGERTWLEFWPSELQSKTSAELKLCDYIMSFSKNSSSAGCKN          |         |
|                                               | 1611 | FWGEEKPNLSY    | IIGKDTWVEHWPEDDECQDEENQKQCDLGAFTESMVFVGC             | PN      |

**Figure XVI.** Structural comparison of the complement C3 between *Danio rerio* and *Homo sapiens*. The FASTA files related to zebrafish and human proteins were acquired on the UNIPROT search platform (<http://www.uniprot.org>).



|                     |      |                                                                       |
|---------------------|------|-----------------------------------------------------------------------|
| sp P01026 CO3_RAT   | 1    | MGPTSGSQLLVLLLLASSL LALGSPMYSITPNVLRLESEETFL LEAHDAQGDVPVTVT          |
| sp P01024 CO3_HUMAN | 1    | MGPTSGP..SLLLLLTHLPLALGSPMYSITPNILRLESEETMVL LEAHDAQGDVPVTVT          |
| sp P01026 CO3_RAT   | 61   | VQDFLKKQVLTSEKTVLTGATGHLNRVFIKIPASKEFNADKGHKYVTVVANFGATVVE            |
| sp P01024 CO3_HUMAN | 59   | VHDFPGKKLVLSSEKTVLTPATNHMGNVFTFIPANREEKSEKGRNKEVTVQAFGTQVVE           |
| sp P01026 CO3_RAT   | 119  | KAVLVSFQSGYLFIQTDKTIYTPGSTVEYRIFTVDNLLPVGKTVVIVIEIPDGVPIKRD           |
| sp P01024 CO3_HUMAN | 119  | KVVLVSTQSGYLFIQTDKTIYTPGSTVLYRIFTVNHKLLPVGRTVMVNIENPEGIPVQRD          |
| sp P01026 CO3_RAT   | 179  | ILSSHNQYGCILPLSWNIPELVNMGQWKIRAFYEHAPEKQTFSAEFEVKEYVLPSEFVIVPEP       |
| sp P01024 CO3_HUMAN | 179  | SLSSONQLGVLPISWDIPELVNMGQWKIRAYEENSPEQVFSFEFEVKEYVLPSEFVIVPEP         |
| sp P01026 CO3_RAT   | 239  | TEKFYIYHGP KGLEVSI TARFLYGNVDGTAFVIFGVQDEDKKISLALSLTRVLI EDGSG        |
| sp P01024 CO3_HUMAN | 239  | TEKFYIYNE KGLEVSI TARFLYGNKVEGTAFVIFGVQDEGEQRISLPESLKRILP IEDGSG      |
| sp P01026 CO3_RAT   | 299  | EAVLSRKVLM DGV RPSSEALV GKSLSYVS VVILHSGSDMVEAERSGIPIVTSPYQIHFT       |
| sp P01024 CO3_HUMAN | 299  | EVVLSRKVLD DGV QNPRAE DLV GKSLSYVS ATVILHSGSDMVQAERSGIPIVTSPYQIHFT    |
| sp P01026 CO3_RAT   | 359  | KTPKFKPAMPFDLMVFVTPNDGSPARVVPVTOGSDAQALTO D DGVAKLSVNT PNNRQ          |
| sp P01024 CO3_HUMAN | 359  | KTPKFKPAMPFDLMVFVTPNDGSPAYRVPVAVOGE DTVQSLTO D DGVAKLSVNT HPSRQ       |
| sp P01026 CO3_RAT   | 418  | PLTITVSTKKEGTPDARQATRTMQAQPYSTMHNSNNYLHLSVSRVELKPGDNLNVNHLR           |
| sp P01024 CO3_HUMAN | 419  | PLSITVSTKKEGTPDARQATRTMQALPYSTVGNNSNNYLHLSVLRTEL R PGETLNVNHLR        |
| sp P01026 CO3_RAT   | 478  | TDAGQEA KIRYYTYLV MNKGRLLKAGRQVREPGQDLVVLSPITP EFIPSRFLVAYYTLI        |
| sp P01024 CO3_HUMAN | 479  | MDRAHEA KIRYYTYLV MNKGRLLKAGRQVREPGQDLVVLPLSITP D EFIPSRFLVAYYTLI     |
| sp P01026 CO3_RAT   | 538  | GANGQREVVADSVVVDVKDSCVGT LVVKGDPDRDNROPAPGHOTLRIEGNOGARVGLVAV         |
| sp P01024 CO3_HUMAN | 539  | GASGQREVVADSVVVDVKDSCVGS LVVKS GQSEDRQRPVPGQOMTLRIEGDHGARVVLAV        |
| sp P01026 CO3_RAT   | 598  | DKGVFVLNKKNKLTQSKIWDVVEKADIGCTPGSGKNYAGVFM DAGLTFKTNQGLQTDQRE         |
| sp P01024 CO3_HUMAN | 599  | DKGVFVLNKKNKLTQSKIWDVVEKADIGCTPGSGKD YAGVFS DAGLTFSSSGQQTAAQRA        |
| sp P01026 CO3_RAT   | 658  | DPECAKPAARRRRSVOLMERMDKAGQYTDKGLRKCCEGDMRIPMPYSCORRARLITQG            |
| sp P01024 CO3_HUMAN | 659  | ELQCPQPAARRRRSVOLTEKRMKDKVGY PKE LRKCCEGDMRENPMRESCORRRTRFISLG        |
| sp P01026 CO3_RAT   | 718  | ESCLKAFMDCCNYITKLRERQHRRDHV LGLARSVDDEDIIP EEDIISRSHPFESWLWTIEE       |
| sp P01024 CO3_HUMAN | 718  | EACKRVFLDCCNYITELRERQHARASH LGLARSNDDEDIIE ENIISRSHPFESWLWNVED        |
| sp P01026 CO3_RAT   | 778  | LKEPEKNGISTKVMNIFLKDSITWEILAVSISDKKGCIVADPVEETVMQDFFIDLRLPY           |
| sp P01024 CO3_HUMAN | 778  | LKEPEKNGISTKLMNIFLKDSITWEILAVSM SDDKGCIVADPVEETVMQDFFIDLRLPY          |
| sp P01026 CO3_RAT   | 838  | SVVRNEQVEIRAVL E NYRQEKLVVRVELLHNPFCSMATAKKRY YQTI EIPPKSSVAVE        |
| sp P01024 CO3_HUMAN | 838  | SVVRNEQVEIRAVL E NYRQEKLVVRVELLHNPFCSMATTKRRHQQTIVTIPPKSSLSVE         |
| sp P01026 CO3_RAT   | 898  | YVIVPLKIGLQEEVEKAAVFNHFTSDGVKKILKVVPEGRMKNKTAVVRTLDPERL NQGGV         |
| sp P01024 CO3_HUMAN | 898  | YVIVPLKTGLQEEVEKAAVYHFTSDGVKRSLKVVPEGRMKNKTAVVRTLDPERL GREGV          |
| sp P01026 CO3_RAT   | 958  | QREDVNAADLSDQVPD T DSETRILLQGTPVAQMAEDA V DGERLKHILVTPSGCGEQNMIG      |
| sp P01024 CO3_HUMAN | 958  | QKEDIIPADLSDQVPD T ESETRILLQGTPVAQMTEDA V DGERLKHILVTPSGCGEQNMIG      |
| sp P01026 CO3_RAT   | 1018 | MTPTVIAVHYLDQTEQWEKFGLEKREQALELKKGYTQQLAFKQPI S AYAANRNP PSTW         |
| sp P01024 CO3_HUMAN | 1018 | MTPTVIAVHYLDETEQWEKFGLEKREQALELKKGYTQQLAFRQPS S AFAAVKRAPSTW          |
| sp P01026 CO3_RAT   | 1078 | LTA MWSRSLAANLIAIDSQVLCGAVKWLILEKQKPDGVFQEDG PVIHQEMIGGFRNTK          |
| sp P01024 CO3_HUMAN | 1078 | LTA YVVKVFSLAVNLIAIDSQVLCGAVKWLILEKQKPDGVFQEDA PVIHQEMIGGLRNNK        |
| sp P01026 CO3_RAT   | 1138 | EADVSLTAFVLI A LQEAR DICEQVNSLPGSINKAGEYLEASYNLQR P YTVAIAGYALA       |
| sp P01024 CO3_HUMAN | 1138 | EKDMALTAFLVLI S LQEAR DICEQVNSLPGSITKAGDFLEANYNLQRS YTVAIAGYALA       |
| sp P01026 CO3_RAT   | 1198 | LMNKL EEPYLT KFLN TAKDRNRWE EPGQOLYNVEATS YALLALL LKDFDS VPPVVRWLN    |
| sp P01024 CO3_HUMAN | 1198 | QMGR LKGEELN KFLN TAKDRNRWE DPGKOLYNVEATS YALLALL LKDFD F VPPVVRWLN   |
| sp P01026 CO3_RAT   | 1258 | DE RYGGGYGSTQATFMVFQALAQYRADVPDHKDLNMDVSLH LPSRSSPTVFRILWESGS         |
| sp P01024 CO3_HUMAN | 1258 | EQRYGGGYGSTQATFMVFQALAQYQK DAPDHQELNMDVSLQLPSRSSKITHRH WESAS          |
| sp P01026 CO3_RAT   | 1318 | LLRSEETKQNEGFSLTAKGKGQTL SVVTVYHAKVKGKTTCCKFDL RVTIKPAPETA KKP        |
| sp P01024 CO3_HUMAN | 1318 | LLRSEETKQNEGFIVTAEKKGQTL SVVTVYHAKAKDQLTCNKFDL RVTIKPAPETA KRP        |
| sp P01026 CO3_RAT   | 1378 | QDAKSSMIL DICTRYLGDV DATMSILDISM TGFIPDNTDLEL LSGVD RYISKYEMDKA       |
| sp P01024 CO3_HUMAN | 1378 | QDAKNTMIL EICTRYLGDV DATMSILDISM TGFAPDNTDLKQL ANGVDRYISKYELDKA       |
| sp P01026 CO3_RAT   | 1438 | FSNKNLTIYLEKISHSEEDCLSFKVHGF FNVGLIQPGAVKVYSYNLEESCTRFYHPEK           |
| sp P01024 CO3_HUMAN | 1438 | FSDRNTLTIYLDKISHSEEDCLSFKVHGF FNVGLIQPGAVKVYAYNLEESCTRFYHPEK          |
| sp P01026 CO3_RAT   | 1498 | DDGMLS KLCHEMCRCAEENC F HQSDDQVSLNERLDKACEPGVDVYKTR LITIELSD D        |
| sp P01024 CO3_HUMAN | 1498 | EDGKLNKLCRDELCRCAEENC F QKSDDKVTLNERLDKACEPGVDVYKTR L V K V Q L S N D |
| sp P01026 CO3_RAT   | 1558 | FDEYIMTIEQVIKSGSDEVQAGQERRR FISHVKCRNALKKQKQKQYLMWGLSSDLWGEKPN        |
| sp P01024 CO3_HUMAN | 1558 | FDEYIMAEIEQVIKSGSDEVQVGQOR T FISPIKCRNALKHEEKHYLMWGLSSDFWGEKPN        |
| sp P01026 CO3_RAT   | 1618 | TSYIIIGKDTWVEHWPEAEERQDQKNQKQCEDLGAFTE TMVVF GCPN                     |
| sp P01024 CO3_HUMAN | 1618 | LSYIIIGKDTWVEHWPEAEDECQDEENQKQCQDLGAFTESMVVF GCPN                     |

**Figure XVII.** Structural comparison of the complement C3 between *Rattus norvegicus* and *Homo sapiens*. The FASTA files related to rodent and human proteins were acquired on the UNIPROT search platform (<http://www.uniprot.org>).

|                     |      |      |      |      |      |      |    |
|---------------------|------|------|------|------|------|------|----|
| sp P01027 CO3_MOUSE | 1    | 10   | 20   | 30   | 40   | 50   | 60 |
| sp P01024 CO3_HUMAN | 1    | 10   | 20   | 30   | 40   | 50   | 60 |
| sp P01027 CO3_MOUSE | 70   | 80   | 90   | 100  | 110  |      |    |
| sp P01024 CO3_HUMAN | 70   | 80   | 90   | 100  | 110  |      |    |
| sp P01027 CO3_MOUSE | 120  | 130  | 140  | 150  | 160  | 170  |    |
| sp P01024 CO3_HUMAN | 120  | 130  | 140  | 150  | 160  | 170  |    |
| sp P01027 CO3_MOUSE | 180  | 190  | 200  | 210  | 220  | 230  |    |
| sp P01024 CO3_HUMAN | 180  | 190  | 200  | 210  | 220  | 230  |    |
| sp P01027 CO3_MOUSE | 240  | 250  | 260  | 270  | 280  | 290  |    |
| sp P01024 CO3_HUMAN | 240  | 250  | 260  | 270  | 280  | 290  |    |
| sp P01027 CO3_MOUSE | 300  | 310  | 320  | 330  | 340  | 350  |    |
| sp P01024 CO3_HUMAN | 300  | 310  | 320  | 330  | 340  | 350  |    |
| sp P01027 CO3_MOUSE | 360  | 370  | 380  | 390  | 400  | 410  |    |
| sp P01024 CO3_HUMAN | 360  | 370  | 380  | 390  | 400  | 410  |    |
| sp P01027 CO3_MOUSE | 420  | 430  | 440  | 450  | 460  | 470  |    |
| sp P01024 CO3_HUMAN | 420  | 430  | 440  | 450  | 460  | 470  |    |
| sp P01027 CO3_MOUSE | 480  | 490  | 500  | 510  | 520  | 530  |    |
| sp P01024 CO3_HUMAN | 480  | 490  | 500  | 510  | 520  | 530  |    |
| sp P01027 CO3_MOUSE | 540  | 550  | 560  | 570  | 580  | 590  |    |
| sp P01024 CO3_HUMAN | 540  | 550  | 560  | 570  | 580  | 590  |    |
| sp P01027 CO3_MOUSE | 600  | 610  | 620  | 630  | 640  | 650  |    |
| sp P01024 CO3_HUMAN | 600  | 610  | 620  | 630  | 640  | 650  |    |
| sp P01027 CO3_MOUSE | 660  | 670  | 680  | 690  | 700  | 710  |    |
| sp P01024 CO3_HUMAN | 660  | 670  | 680  | 690  | 700  | 710  |    |
| sp P01027 CO3_MOUSE | 720  | 730  | 740  | 750  | 760  | 770  |    |
| sp P01024 CO3_HUMAN | 720  | 730  | 740  | 750  | 760  | 770  |    |
| sp P01027 CO3_MOUSE | 780  | 790  | 800  | 810  | 820  | 830  |    |
| sp P01024 CO3_HUMAN | 780  | 790  | 800  | 810  | 820  | 830  |    |
| sp P01027 CO3_MOUSE | 840  | 850  | 860  | 870  | 880  | 890  |    |
| sp P01024 CO3_HUMAN | 840  | 850  | 860  | 870  | 880  | 890  |    |
| sp P01027 CO3_MOUSE | 900  | 910  | 920  | 930  | 940  | 950  |    |
| sp P01024 CO3_HUMAN | 900  | 910  | 920  | 930  | 940  | 950  |    |
| sp P01027 CO3_MOUSE | 960  | 970  | 980  | 990  | 1000 | 1010 |    |
| sp P01024 CO3_HUMAN | 960  | 970  | 980  | 990  | 1000 | 1010 |    |
| sp P01027 CO3_MOUSE | 1020 | 1030 | 1040 | 1050 | 1060 | 1070 |    |
| sp P01024 CO3_HUMAN | 1020 | 1030 | 1040 | 1050 | 1060 | 1070 |    |
| sp P01027 CO3_MOUSE | 1080 | 1090 | 1100 | 1110 | 1120 | 1130 |    |
| sp P01024 CO3_HUMAN | 1080 | 1090 | 1100 | 1110 | 1120 | 1130 |    |
| sp P01027 CO3_MOUSE | 1140 | 1150 | 1160 | 1170 | 1180 | 1190 |    |
| sp P01024 CO3_HUMAN | 1140 | 1150 | 1160 | 1170 | 1180 | 1190 |    |
| sp P01027 CO3_MOUSE | 1200 | 1210 | 1220 | 1230 | 1240 | 1250 |    |
| sp P01024 CO3_HUMAN | 1200 | 1210 | 1220 | 1230 | 1240 | 1250 |    |
| sp P01027 CO3_MOUSE | 1260 | 1270 | 1280 | 1290 | 1300 | 1310 |    |
| sp P01024 CO3_HUMAN | 1260 | 1270 | 1280 | 1290 | 1300 | 1310 |    |
| sp P01027 CO3_MOUSE | 1320 | 1330 | 1340 | 1350 | 1360 | 1370 |    |
| sp P01024 CO3_HUMAN | 1320 | 1330 | 1340 | 1350 | 1360 | 1370 |    |
| sp P01027 CO3_MOUSE | 1380 | 1390 | 1400 | 1410 | 1420 | 1430 |    |
| sp P01024 CO3_HUMAN | 1380 | 1390 | 1400 | 1410 | 1420 | 1430 |    |
| sp P01027 CO3_MOUSE | 1440 | 1450 | 1460 | 1470 | 1480 | 1490 |    |
| sp P01024 CO3_HUMAN | 1440 | 1450 | 1460 | 1470 | 1480 | 1490 |    |
| sp P01027 CO3_MOUSE | 1500 | 1510 | 1520 | 1530 | 1540 | 1550 |    |
| sp P01024 CO3_HUMAN | 1500 | 1510 | 1520 | 1530 | 1540 | 1550 |    |
| sp P01027 CO3_MOUSE | 1560 | 1570 | 1580 | 1590 | 1600 | 1610 |    |
| sp P01024 CO3_HUMAN | 1560 | 1570 | 1580 | 1590 | 1600 | 1610 |    |
| sp P01027 CO3_MOUSE | 1620 | 1630 | 1640 | 1650 | 1660 |      |    |
| sp P01024 CO3_HUMAN | 1620 | 1630 | 1640 | 1650 | 1660 |      |    |

**Figure XVIII.** Structural comparison of the complement C3 between *Mus musculus* and *Homo sapiens*. The FASTA files related to rodent and human proteins were acquired on the UNIPROT search platform (<http://www.uniprot.org>).

|                                               |            |                                                                                                                                                                                                                                                     |
|-----------------------------------------------|------------|-----------------------------------------------------------------------------------------------------------------------------------------------------------------------------------------------------------------------------------------------------|
| tr I3J4H8 I3J4H8_ORENI<br>sp P00738 HPT_HUMAN | 1          | MSALGAVIALLLWGQLFAVDSGNDVTDIADDGCPKPPEIAHGYVEHSVRYQCKNYYKLRT                                                                                                                                                                                        |
| tr I3J4H8 I3J4H8_ORENI<br>sp P00738 HPT_HUMAN | 61         | EGDGVYTLNDKKQWINKAVGDKLPECEADDGCPKPPEIAHGYVEHSVRYQCKNYYKLRT                                                                                                                                                                                         |
| tr I3J4H8 I3J4H8_ORENI<br>sp P00738 HPT_HUMAN | 121        | .....MKGSVLASRTASLRSRMVGGLAPH..V PWQAMVY<br>GDGVYTLNNEKQWINKAVGDKLPECEAVCGKPKNPANPVQRILGGHLDAGKGSFPWQAKMV                                                                                                                                           |
| tr I3J4H8 I3J4H8_ORENI<br>sp P00738 HPT_HUMAN | 35<br>181  | IAE S I L D C G Y A G G A L T S D R W V L T A G R N L F V K K S R E A I Q G K E P V I P K V Y I G I T K K D D A N S S<br>S H H N L T T G . . . . A T L L N E Q W L L T A K N L F L N H S E N A T A K D I A P T L T L Y V G K K Q . . . . .          |
| tr I3J4H8 I3J4H8_ORENI<br>sp P00738 HPT_HUMAN | 95<br>230  | SE V A V E K V L L H P G F Q N Q S D W N N D L A L T Q L K O P V V I N D K V T P I P L P E R G Q D L A K A V H G S G I<br>. L V E I E K V V L L H P N Y S . . . . . Q V D I G L I K L K Q K V S V N E R V M P I C L P S K D . . . Y A E V G R V G Y |
| tr I3J4H8 I3J4H8_ORENI<br>sp P00738 HPT_HUMAN | 155<br>281 | I T G W G W G P L L T P S P F L K H I V V P L A N H S E C R A E Y E S . . . . . F A L T P T V D D D M I C<br>V S G W G R N A N F K F T D H L K Y V M L P V A D Q D Q C I R H Y E G S T V P E K K T P K S P V G V O P I L N E H T F C                |
| tr I3J4H8 I3J4H8_ORENI<br>sp P00738 HPT_HUMAN | 203<br>341 | T A A T K Y Q E N V C F G D A G G A L A V T D P E T G D I Y A A G I L S Y D K S C T R Y K H A V Y M K L S S Y L P W I H<br>A G M S K Y Q E D T C Y G D A G S A F A V H D L E E D T W Y A T G I L S F D K S C A V A E Y G V Y V K V T S I Q D W V Q  |
| tr I3J4H8 I3J4H8_ORENI<br>sp P00738 HPT_HUMAN | 263<br>401 | S I M R G D T D T S T A V R F K A M S S M Y R R Q E<br>K T I A E N . . . . .                                                                                                                                                                        |

**Figure XIX.** Structural comparison of the haptoglobin between *Oreochromis niloticus* and *Homo sapiens*. The FASTA files related to tilapia and human proteins were acquired from the UNIPROT search platform (<http://www.uniprot.org>).

|                                               |            |                                                                                                                                                                                                                                                      |
|-----------------------------------------------|------------|------------------------------------------------------------------------------------------------------------------------------------------------------------------------------------------------------------------------------------------------------|
| tr F8W5P2 F8W5P2_DANRE<br>sp P00738 HPT_HUMAN | 1          | MSALGAVIALLLWGQLFAVDSGNDVTDIADDGCPKPPEIAHGYVEHSVRYQCKNYYKLRT                                                                                                                                                                                         |
| tr F8W5P2 F8W5P2_DANRE<br>sp P00738 HPT_HUMAN | 1<br>61    | .....MRWLSVAVLLGLTLPD D A S F . . . . . A L E R V<br>EGDGVYTLNDKKQWINKAVGDKLPECEADDGCPKPPEIAHGYVEHSVRYQCKNYYKLRT                                                                                                                                     |
| tr F8W5P2 F8W5P2_DANRE<br>sp P00738 HPT_HUMAN | 28<br>121  | GEH V S A L R S . . . . . R M V G G S I T A S . . V P W Q A M V Y<br>GDGVYTLNNEKQWINKAVGDKLPECEAVCGKPKNPANPVQRILGGHLDAGKGSFPWQAKMV                                                                                                                   |
| tr F8W5P2 F8W5P2_DANRE<br>sp P00738 HPT_HUMAN | 56<br>181  | L S E N I L D C G F A G G A L T A E R W V L T A G R N L F V G K S K I Q T R G Q E P L I P K V Y I G I S K R A D A T A S<br>S H H N L T T G . . . . A T L L N E Q W L L T A K N L F L N H S E N A T A K D I A P T L T L Y V G K K Q . . . . .         |
| tr F8W5P2 F8W5P2_DANRE<br>sp P00738 HPT_HUMAN | 116<br>230 | T E V A V E K V L L H P G F Q N T S D W D N D L A L I K L K E P V K F S K S I L P I P L P E T G D N L E E R D C E R G I<br>. L V E I E K V V L L H P N Y S . . . . . Q V D I G L I K L K Q K V S V N E R V M P I C L P S K . . . D Y A E V G R V G Y |
| tr F8W5P2 F8W5P2_DANRE<br>sp P00738 HPT_HUMAN | 176<br>281 | V A G W G W G R L L T P A P V L K F L S L P V K S . . C K G N Y Q A R V L E S . . . . . T P N T D D K Q F C<br>V S G W G R N A N F K F T D H L K Y V M L P V A D Q D Q C I R H Y E G S T V P E K K T P K S P V G V G I L N E H T F C                 |
| tr F8W5P2 F8W5P2_DANRE<br>sp P00738 HPT_HUMAN | 223<br>341 | T C S G R Y L E N V C F G D A G G A I A F L N T K T N A V Y A A G I L S F D K A C S V E E H A V Y T K I S A H L P W I H<br>A G M S K Y Q E D T C Y G D A G S A F A V H D L E E D T W Y A T G I L S F D K S C A V A E Y G V Y V K V T S I Q D W V Q   |
| tr F8W5P2 F8W5P2_DANRE<br>sp P00738 HPT_HUMAN | 283<br>401 | S V M R G D S Q D I A S Q R S S A I R H M F S Q Q L<br>K T I A E N . . . . .                                                                                                                                                                         |

**Figure XX.** Structural comparison of the haptoglobin between *Danio rerio* and *Homo sapiens*. The FASTA files related to zebrafish and human proteins were acquired on the UNIPROT search platform (<http://www.uniprot.org>).



|                     |     |                                                                  |
|---------------------|-----|------------------------------------------------------------------|
| sp P06866 HPT_RAT   | 1   | MRALGAVVTLLWQQLFAVELGNDATDIEDDSCPKPPEIAN.....                    |
| sp P00738 HPT_HUMAN | 1   | MSALGAVIAALLWQQLFAVDSGNDVTDIADDGCPKPPEIAHGYVEHSVRYQCKNYKLRTE     |
| sp P06866 HPT_RAT   | 42  | .....GYVEHLVRYRCRQFYKLRTE                                        |
| sp P00738 HPT_HUMAN | 61  | EGDGVYTLNDKKQWINKAVGDKLPECEADDGCPKPPEIAHGYVEHSVRYQCKNYKLRTE      |
| sp P06866 HPT_RAT   | 62  | GDGYTLNSEKQVNPAAAGDKLPKCEAVCGKPKHPVDQVQRIIGGSMDAKGSFPWQAKMI      |
| sp P00738 HPT_HUMAN | 121 | GDGVYTLNNEKQWINKAVGDKLPECEAVCGKPKNPANPVQRIIGGHLDAKGSFPWQAKMV     |
| sp P06866 HPT_RAT   | 122 | SRHGLTTGATLISDQWLLTTAKNLFNLHSEENATAKDIAPTLTLYVGKNQLVEIEKVVVLP    |
| sp P00738 HPT_HUMAN | 181 | SHHNLTTGATLINEQWLLTTAKNLFNLHSEENATAKDIAPTLTLYVGKQLVEIEKVVVLP     |
| sp P06866 HPT_RAT   | 182 | ERSVVDIGLIKLRQVLLVTERVMPICLPSKDYIAPGRMGYVSGWGRNVNFRFETDLKLYVM    |
| sp P00738 HPT_HUMAN | 241 | NYSQVDIGLIKLRQVSVNERVMPICLPSKDYAEVGRVGYVSGWGRNANFRFETDHLKYVM     |
| sp P06866 HPT_RAT   | 242 | LPVADQDKCELVHYNSTVPEKKNLTPKSPVGVQPIILNEHTFCAGLTKYQEDTCYGDAGSAFA  |
| sp P00738 HPT_HUMAN | 301 | LPVADQDQCIIRHYEGSTVPEKKNLTPKSPVGVQPIILNEHTFCAGMSKYQEDTCYGDAGSAFA |
| sp P06866 HPT_RAT   | 302 | VHDLDEEDTWYATGILSFDKSCAVAEYGVYVVRATDLDKDWVQETMAKN                |
| sp P00738 HPT_HUMAN | 361 | VHDLDEEDTWYATGILSFDKSCAVAEYGVYVVKVTSIQDWVQKTIAEN                 |

**Figure XXI.** Structural comparison of the haptoglobin between *Rattus norvegicus* and *Homo sapiens*. The FASTA files related to rodent and human proteins were acquired on the UNIPROT search platform (<http://www.uniprot.org>).

|                     |   |     |     |     |     |     |     |
|---------------------|---|-----|-----|-----|-----|-----|-----|
| sp Q61646 HPT_MOUSE | 1 | 10  | 20  | 30  | 40  | 50  | 60  |
| sp P00738 HPT_HUMAN |   |     |     |     |     |     |     |
| sp Q61646 HPT_MOUSE |   | 70  |     |     |     |     |     |
| sp P00738 HPT_HUMAN |   |     |     |     |     |     |     |
| sp Q61646 HPT_MOUSE |   | 80  | 90  | 100 | 110 | 120 |     |
| sp P00738 HPT_HUMAN |   |     |     |     |     |     |     |
| sp Q61646 HPT_MOUSE |   | 130 | 140 | 150 | 160 | 170 | 180 |
| sp P00738 HPT_HUMAN |   |     |     |     |     |     |     |
| sp Q61646 HPT_MOUSE |   | 190 | 200 | 210 | 220 | 230 | 240 |
| sp P00738 HPT_HUMAN |   |     |     |     |     |     |     |
| sp Q61646 HPT_MOUSE |   | 250 | 260 | 270 | 280 | 290 | 300 |
| sp P00738 HPT_HUMAN |   |     |     |     |     |     |     |
| sp Q61646 HPT_MOUSE |   | 310 | 320 | 330 | 340 |     |     |
| sp P00738 HPT_HUMAN |   |     |     |     |     |     |     |

**Figure XXII.** Structural comparison of the haptoglobin between *Mus musculus* and *Homo sapiens*. The FASTA files related to rodent and human proteins were acquired on the UNIPROT search platform (<http://www.uniprot.org>).



|                        |     |                                                                  |
|------------------------|-----|------------------------------------------------------------------|
| tr I3J919 I3J919_ORENI | 1   | ..MQGFYPIILLFSIFVCSVSAKKMRWCTVSDPEQRKCAELAKAIAAVVSPAILAFAFL      |
| sp P02787 TRFE_HUMAN   | 1   | MRLAVGALLVCAVLGLCLAVDPDKTWRWCAVSEHEATKCSFRDHMKSVIP...SDGSPV      |
| tr I3J919 I3J919_ORENI | 58  | SCIRAYSTTDCINRIRKANRADIVTLDAGEIYSAVKQFD.LVAIAKEIYSDDLSTGGCTLS    |
| sp P02787 TRFE_HUMAN   | 57  | ACVKKASYLDICIRATIANEADAVTLDAGLVYDAYLAPNNLKPVVAEFYGSKEDPQTFYYA    |
| tr I3J919 I3J919_ORENI | 117 | VAVVRNNS.LDIRSLOGRRSCHSGVWRWTAGWSLPIGFLLSRNYLSWAKEHPLSQDVSITFF   |
| sp P02787 TRFE_HUMAN   | 117 | VAVVRKDSGFGMQLRCKKKSCHGLGRSAGWNIPGILLYCDLPE...PRKPLEKAVANFF      |
| tr I3J919 I3J919_ORENI | 176 | SASCIPGAGAMALP.LCTLCOGLKSYIRQKNYHCETSHSEPFYNNOGALRCLRRCTGDVA     |
| sp P02787 TRFE_HUMAN   | 174 | SGSCAPCADGTDFFQLCQLCP.....GCGCSTLNOYFYGSGAFKCLKDGAGDVA           |
| tr I3J919 I3J919_ORENI | 235 | FVDHLALET.IEESERDEFRLLCSDCTQAPLSQHRSCNLRGPGGGMVTRVNFRKVVVK       |
| sp P02787 TRFE_HUMAN   | 223 | FVKHSTIFENLANKADRQYBLLCLDNTRKPVDEYKDCHTAQVPSHTVVARSMGGKEDLI      |
| tr I3J919 I3J919_ORENI | 293 | FLATVQTLFGRQGRERQR.FQLFSSSSFGENDLLFRDVEKLVVLLQDDIDVVSQVGLDYVA    |
| sp P02787 TRFE_HUMAN   | 283 | WELLNQAQEHFGKDKSKE.FQLFSSPHG..KDLLFKDSAHGFLKVPFRMDAKMYLGYBYVT    |
| tr I3J919 I3J919_ORENI | 353 | LLKGLGH...EGSLEDsvIRWCITSYAEQKCEQWALSIKSDPLVQVRAISMRDCIEK        |
| sp P02787 TRFE_HUMAN   | 341 | AIRNLRREGTCEAPTEDECKPVKWCASHHERLKCDEWSVNSVVG.KLIECVSAETEDCIAK    |
| tr I3J919 I3J919_ORENI | 409 | IKRDEVDVAVSLDATHSFIAGKCGLVVVT EY YGKNCVPAEGSTHLETDVFPSSVVG IAVVK |
| sp P02787 TRFE_HUMAN   | 400 | IMNGEADAMSLDGGFVYIAGKCGLVVLAENYNK.....SDNCEDTPEAGYFA IAVVK       |
| tr I3J919 I3J919_ORENI | 469 | HSSRNIFIGNLGGRRSCHSNTYSPAGWLPYRHSLSLANSSSSPCDPDKVYNEVFWKSCLE     |
| sp P02787 TRFE_HUMAN   | 453 | KSASDLTWDNLKCKKKSCHAVGRTAGWNIPMGLLYNKLNHCR.....DEFFFESECA        |
| tr I3J919 I3J919_ORENI | 529 | PGSK..GNLCKVCTGTGETATKRCTENHNERYYGNMGALRCLVGRDRSGKSYGDVAFLEQ     |
| sp P02787 TRFE_HUMAN   | 505 | PGSKKDSLSLCKKCMG...SGLNLCEPNNKEEYYGYTGAFRCLVEK.....GDVAFVKH      |
| tr I3J919 I3J919_ORENI | 587 | HSLHTNILGLNITGWAEGWSSSDFELLCADGRRAPLSDWETCNLGVIPNPTVMTRPVLT A    |
| sp P02787 TRFE_HUMAN   | 555 | QTVPONTGKNPDPWAKNLSNEKDYELLCLDGT RKPV EY ANCHLARAPNHAVTRKDKEA    |
| tr I3J919 I3J919_ORENI | 647 | RVYDFLMKSOEALAVNSNTEFRLEFESHQYGESDLLFKDATQCFATSHMD.YRSILGEEF     |
| sp P02787 TRFE_HUMAN   | 615 | CVHKILRQQQHLLFGSNVTDCSGNFCLFRSETKDLLFRDPTVCLALHLDNRNTYEKYLGE EY  |
| tr I3J919 I3J919_ORENI | 706 | YTHADTVFNCTHSDILEFCNQDVC                                         |
| sp P02787 TRFE_HUMAN   | 675 | VKAVGNLRKCSISLLEACTIFRRP                                         |

**Figure XXIII.** Structural comparison of the serotransferrin between *Oreochromis niloticus* and *Homo sapiens*. The FASTA files related to tilapia and human proteins were acquired on the UNIPROT search platform (<http://www.uniprot.org>).

|                        |     |      |    |    |    |    |    |    |    |     |    |    |    |    |     |    |    |   |       |    |    |   |   |   |   |   |    |   |   |   |   |   |   |   |   |   |   |   |    |       |    |       |   |    |   |       |   |   |   |       |       |    |   |   |    |   |     |   |    |   |   |
|------------------------|-----|------|----|----|----|----|----|----|----|-----|----|----|----|----|-----|----|----|---|-------|----|----|---|---|---|---|---|----|---|---|---|---|---|---|---|---|---|---|---|----|-------|----|-------|---|----|---|-------|---|---|---|-------|-------|----|---|---|----|---|-----|---|----|---|---|
| tr B8JL43 B8JL43_DANRE | 1   | MKVL | LI | SL | LG | CL | LV | AV | PS | ASA | QK | VK | WC | VT | QNE | FQ | SK | R | ..... | H  | T  | A | T | K | A | A | D  | T | E | C | H | L |   |   |   |   |   |   |    |       |    |       |   |    |   |       |   |   |   |       |       |    |   |   |    |   |     |   |    |   |   |
| sp P02787 TRFE_HUMAN   | 1   | MRLA | V  | G  | A  | L  | L  | V  | CA | V   | L  | G  | L  | C  | L   | A  | V  | P | D     | K  | T  | V | R | W | C | A | V  | S | E | H | E | A | T | K | C | Q | S | F | R  | D     | H  | M     | K | S  | V | L     | P | S | D | G     | P     | S  | V | A | C  | V | K   |   |    |   |   |
| tr B8JL43 B8JL43_DANRE | 53  | QP   | T  | V  | I  | D  | C  | M  | R  | S   | I  | A  | A  | G  | G   | T  | D  | I | V     | T  | D  | G | A | N | V | F | T  | G | G | L | N | N | Y | L | R | P | I | I | A  | E     | K  | ..... | K | E  | C | C     | Y | A | V | A     | V     |    |   |   |    |   |     |   |    |   |   |
| sp P02787 TRFE_HUMAN   | 61  | K    | A  | S  | Y  | L  | D  | C  | H  | R   | A  | I  | A  | A  | N   | E  | A  | D | A     | V  | T  | E | D | A | G | L | V  | Y | D | A | Y | L | A | P | N | N | L | K | P  | V     | V  | A     | E | F  | Y | G     | S | K | E | D     | P     | Q  | T | F | Y  | Y | A   | V | A  | V |   |
| tr B8JL43 B8JL43_DANRE | 107 | R    | A  | G  | S  | G  | F  | N  | I  | N   | E  | L  | K  | G  | K   | S  | S  | C | H     | S  | C  | Y | Q | R | S | G | W  | N | T | P | I | G | K | L | I | A | T | N | K  | I     | T  | W     | E | G  | P | N     | E | M | P | V     | E     | R  | A | V | S  | E | F   | F | S  |   |   |
| sp P02787 TRFE_HUMAN   | 121 | R    | K  | D  | S  | G  | F  | Q  | M  | N   | Q  | L  | R  | G  | K   | S  | C  | H | S     | C  | H  | T | G | L | R | S | A  | G | W | N | T | P | I | G | L | L | Y | C | D  | L     | P  | E     | P | R  | K | ..... | P | L | E | K     | A     | V  | A | N | F  | F | S   |   |    |   |   |
| tr B8JL43 B8JL43_DANRE | 167 | S    | C  | V  | P  | G  | V  | S  | K  | P   | K  | Y  | P  | N  | L   | C  | K  | A | Q     | C  | G  | D | C | S | H | N | E  | K | Y | F | G | D | D | G | A | F | Q | C | L  | K     | N  | D     | N | G  | Q | V     | A | F | V | C     | H     | H  | A | T | P  | E | ... |   |    |   |   |
| sp P02787 TRFE_HUMAN   | 176 | S    | C  | A  | P  | C  | A  | D  | G  | T   | D  | F  | P  | Q  | L   | C  | Q  | L | C     | P  | G  | C | G | S | T | L | N  | Q | Y | F | G | Y | S | G | A | F | K | C | L  | K     | D  | G     | A | D  | V | A     | F | V | K | H     | S     | T  | I | F | E  | N | L   | A |    |   |   |
| tr B8JL43 B8JL43_DANRE | 224 | ..   | S  | E  | R  | Q  | N  | Y  | E  | L   | L  | C  | M  | D  | C   | S  | R  | K | S     | V  | E  | D | Y | K | T | C | N  | F | A | R | E | P | A | R | T | V | I | A | R  | ..... | T  | D     | D | L  | Q | Y     | V | Y | D | V     | L     | K  | Q | I | P  |   |     |   |    |   |   |
| sp P02787 TRFE_HUMAN   | 235 | N    | K  | A  | D  | R  | D  | Q  | Y  | E   | L  | L  | C  | M  | D   | N  | T  | R | K     | P  | V  | E | D | Y | K | D | C  | H | L | A | Q | V | P | S | H | T | V | V | A  | R     | S  | M     | G | G  | K | E     | D | L | I | W     | E     | L  | L | N | Q  | A | E   | H | F  | G |   |
| tr B8JL43 B8JL43_DANRE | 277 | A    | S  | D  | L  | F  | S  | S  | Q  | A   | F  | G  | .. | G  | K   | D  | L  | I | F     | S  | D  | S | A | T | E | L | M  | L | L | P | K | R | T | D | S | L | Y | L | K  | E     | E  | Y     | E | A  | M | Q     | A | F | K | D     | G     | .. | N | P | S  | A | P   |   |    |   |   |
| sp P02787 TRFE_HUMAN   | 295 | K    | D  | K  | S  | K  | E  | F  | Q  | L   | F  | S  | S  | P  | H   | G  | K  | D | L     | L  | F  | D | S | A | H | G | F  | L | K | V | P | P | R | M | D | A | K | M | Y  | L     | G  | Y     | E | V  | T | A     | R | N | L | R     | E     | G  | T | C | P  | E | A   | P |    |   |   |
| tr B8JL43 B8JL43_DANRE | 333 | T    | S  | Q  | T  | K  | .. | L  | A  | M   | C  | T  | I  | G  | H   | A  | E  | K | N     | K  | C  | D | S | L | D | H | .. | V | K | K | S | C | T | L | E | A | S | V | D  | D     | C  | T     | E | K  | I | K     | R | K | E | A     | D     | F  | L | A | V  | D | G   | G |    |   |   |
| sp P02787 TRFE_HUMAN   | 355 | T    | D  | E  | C  | K  | P  | V  | K  | W   | C  | A  | L  | S  | H   | E  | R  | L | K     | C  | D  | E | W | S | V | N | S  | V | G | K | I | E | C | V | S | A | E | T | T  | E     | D  | C     | T | A  | K | I     | M | N | G | E     | A     | D  | A | M | S  | L | D   | G | G  | F |   |
| tr B8JL43 B8JL43_DANRE | 389 | V    | Y  | I  | A  | G  | K  | C  | G  | L   | V  | P  | V  | M  | A   | E  | Q  | S | N     | S  | Q  | S | C | S | S | G | S  | G | T | A | S | Y | A | V | A | V | R | K | .. | G     | S  | G     | L | T  | W | N     | N | L | E | G     | K     | K  | S | C | H  | T | G   | L |    |   |   |
| sp P02787 TRFE_HUMAN   | 415 | V    | Y  | I  | A  | G  | K  | C  | G  | L   | V  | P  | V  | L  | A   | E  | N  | Y | N     | .. | K  | S | D | N | C | E | D  | T | P | E | A | G | Y | F | A | L | A | V | V  | K     | K  | S     | A | S  | D | L     | T | W | D | N     | L     | K  | G | K | K  | S | C   | H | T  | A | V |
| tr B8JL43 B8JL43_DANRE | 448 | G    | R  | S  | A  | G  | W  | K  | I  | P   | E  | S  | A  | I  | C   | G  | E  | K | D     | K  | C  | T | L | D | K | F | F  | S | E | G | C | A | P | G | A | D | P | T | S  | N     | M  | C     | K | L  | C | K     | G | S | C | K     | P     | V  | G | D | E  | S | K   | C | K  | P | S |
| sp P02787 TRFE_HUMAN   | 474 | G    | R  | T  | A  | G  | W  | N  | I  | P   | M  | G  | L  | L  | Y   | N  | K  | I | N     | H  | C  | R | F | D | E | F | F  | S | E | G | C | A | P | G | S | K | K | D | S  | S     | L  | C     | K | L  | C | M     | G | S | C | ..... | L     | N  | L | C | E  | P | N   |   |    |   |   |
| tr B8JL43 B8JL43_DANRE | 508 | A    | E  | E  | Q  | Y  | Y  | G  | Y  | D   | G  | A  | F  | R  | C   | L  | A  | E | K     | A  | G  | D | V | A | F | I | K  | H | T | V | G | D | Y | T | D | G | K | G | K  | D     | .. | W     | A | K  | D | L     | K | S | E | D     | F     | E  | L | I | C  | P | N   | T | P  | D |   |
| sp P02787 TRFE_HUMAN   | 529 | N    | K  | E  | G  | Y  | Y  | G  | Y  | T   | G  | A  | F  | R  | C   | L  | V  | E | K     | G  | .. | D | V | A | F | V | K  | H | Q | T | V | P | Q | N | T | G | G | K | N  | P     | D  | W     | A | K  | N | L     | N | E | K | D     | Y     | E  | L | E | C  | L | D   | G | .. |   |   |
| tr B8JL43 B8JL43_DANRE | 567 | T    | M  | K  | Y  | T  | D  | F  | E  | K   | C  | N  | L  | A  | Q   | V  | P  | V | H     | A  | V  | T | R | E | D | A | R  | S | A | V | V | S | F | L | S | D | I | Q | S  | K     | N  | N     | D | L  | F | T     | S | K | D | G     | ..... |    |   |   |    |   |     |   |    |   |   |
| sp P02787 TRFE_HUMAN   | 586 | T    | R  | K  | P  | V  | E  | E  | Y  | A   | N  | C  | H  | L  | A   | R  | A  | P | N     | H  | A  | V | T | R | K | D | K  | E | A | C | V | H | K | I | L | R | Q | Q | H  | L     | F  | G     | S | N  | V | T     | D | C | S | G     | N     | F  | C | L | F  | R | S   | E | T  |   |   |
| tr B8JL43 B8JL43_DANRE | 618 | K    | N  | L  | L  | F  | T  | D  | G  | T   | K  | C  | L  | Q  | E   | I  | K  | G | ..    | S  | V  | D | D | F | L | T | K  | K | Y | I | D | M | I | E | R | T | Y | K | T  | S     | Q  | N     | V | P  | D | L     | V | K | A | C     | T     | F  | G | N | C  | I | S   | S |    |   |   |
| sp P02787 TRFE_HUMAN   | 646 | K    | D  | L  | L  | F  | R  | D  | D  | T   | V  | C  | L  | A  | K   | L  | H  | D | R     | N  | T  | Y | E | K | Y | L | G  | E | E | Y | V | K | A | V | G | N | L | R | K  | C     | S  | T     | S | .. | L | L     | B | A | C | T     | F     | R  | R | P | .. |   |     |   |    |   |   |

**Figure XXIV.** Structural comparison of the serotransferrin between *Danio rerio* and *Homo sapiens*. The FASTA files related to zebrafish and human proteins were acquired on the UNIPROT search platform (<http://www.uniprot.org>).

|                      |     |                              |                         |                |               |                       |
|----------------------|-----|------------------------------|-------------------------|----------------|---------------|-----------------------|
| sp P12346 TRFE_RAT   | 1   | MRFAVGAALLCAALGLCLAVPDKTVKWC | AVSEHENTKCI             | SFRDHMKTVL     | PADGPR        | LACVK                 |
| sp P02787 TRFE_HUMAN | 1   | MRFAVGAALLCAVVLGLCLAVPDKTVR  | WC                      | AVSEHEATKCI    | SFRDHMKSV     | IPSDGFSVACVK          |
| sp P12346 TRFE_RAT   | 61  | KTSYQDCIKATSGGEADAITLDG      | GWVYDAGLTPNNLKPVAAEFYGS | LEH            | PQTHY         | LAVAVV                |
| sp P02787 TRFE_HUMAN | 61  | KASYLDCIRAIAN EADAVTLDAGL    | VYDAYLAPNNLKPVVAAEFYGS  | KE             | DPQTHY        | YAVAVV                |
| sp P12346 TRFE_RAT   | 121 | KKGTDFQINQLQGKKSCHTGLGRSAG   | WIPIIGLLFCN             | LPEPRKPLEKAVAS | FFSGSC        | VPC                   |
| sp P02787 TRFE_HUMAN | 121 | KKDSGFQINQLRGRKKSCHTGLGRSAG  | WNIPIGLLYC              | LPEPRKPLEKAVAN | FFSGSC        | APC                   |
| sp P12346 TRFE_RAT   | 181 | ADPVAFPQLCQLCPGCGCSPTQP      | FFGYVGAFKCLR            | DGGD           | VAVFKHT       | TIFEVLPQKADR          |
| sp P02787 TRFE_HUMAN | 181 | ADGTDVFPQLCQLCPGCGCS         | TLNQYFGYS               | GAFKCLR        | KDGA          | GDVAVFKHSTIFENLANKADR |
| sp P12346 TRFE_RAT   | 241 | OYELLCLDNRKPPVDQYEDCY        | LARTPSHVVARN            | GD             | GKEDLIWEI     | LKV                   |
| sp P02787 TRFE_HUMAN | 241 | OYELLCLDNRKPPVDYKDC          | HLAQVPSHTVVAR           | SMG            | GKEDLIWEI     | LNV                   |
| sp P12346 TRFE_RAT   | 301 | FQLFGSPLGKDLLFKDSA           | FGLLRVPPRMDYRL          | YLGHS          | YVTAIRN       | QREGV                 |
| sp P02787 TRFE_HUMAN | 301 | FQLFS                        | SPHGKDLLFKDSAHG         | FLRVPPRMD      | KMYLGYE       | YVTAIRN               |
| sp P12346 TRFE_RAT   | 360 | VKWCALSHQERAKCDEWSVSN        | NGQIECESAESTEDCI        | DKI            | VNGEADAMSLDGG | HAYIAGQ               |
| sp P02787 TRFE_HUMAN | 361 | VKWCALSHHERLKCDEWSVSN        | VGKIECVSAETTEDCI        | AKI            | MNGEADAMSLDGG | FVYIAGK               |
| sp P12346 TRFE_RAT   | 420 | CGLVPVMAENYDIS               | SCTNPQS                 | DVFPKGY        | AVAVVKA       | SDS                   |
| sp P02787 TRFE_HUMAN | 421 | CGLVPVMAENY                  | NKSS                    | DNCE           | DTEAGYFA      | AVVKA                 |
| sp P12346 TRFE_RAT   | 480 | GWNIPMGLLFSRINHCKFDEFFS      | QGCAPGV                 | KKNSTL         | CDL           | CIGP                  |
| sp P02787 TRFE_HUMAN | 478 | GWNIPMGLLYNKHINHRFDEFFS      | EGCAPGS                 | KKDSS          | SLC           | R                     |
| sp P12346 TRFE_RAT   | 538 | GAFQCLVEKGDVAFVKHQT          | VLENTNGKN               | TAAWAKD        | LKQED         | DFQLLCPDGT            |
| sp P02787 TRFE_HUMAN | 538 | GAFRCLVEKGDVAFVKHQT          | VPONTG                  | GKNPDP         | WAKN          | LNEKDYELLC            |
| sp P12346 TRFE_RAT   | 598 | LAQAPNHVVSRKEKARVST          | VLTAKD                  | LF             | WKGDK         | DC                    |
| sp P02787 TRFE_HUMAN | 598 | LARAPNHAVVSRKDK              | EA                      | CV             | HKIL          | RQ                    |
| sp P12346 TRFE_RAT   | 658 | TKLP                         | EGT                     | TYE            | YLG           | EY                    |
| sp P02787 TRFE_HUMAN | 658 | AKL                          | H                       | R              | N             | T                     |

**Figure XXV.** Structural comparison of the serotransferrin between *Rattus norvegicus* and *Homo sapiens*. The FASTA files related to rodent and human proteins were acquired on the UNIPROT search platform (<http://www.uniprot.org>).



|                      |     |                                                                                                                                                                                                                                                                                                                                   |
|----------------------|-----|-----------------------------------------------------------------------------------------------------------------------------------------------------------------------------------------------------------------------------------------------------------------------------------------------------------------------------------|
| sp Q921I1 TRFE_MOUSE | 1   | MRLTVGALLACAA <sup>1</sup> LG <sup>2</sup> LCLAVPDKTV <sup>3</sup> KWCAVSEHEN <sup>4</sup> TKC <sup>5</sup> ISFRDHMK <sup>6</sup> TVLPP <sup>7</sup> DGPR <sup>8</sup> LACVK <sup>9</sup>                                                                                                                                         |
| sp P02787 TRFE_HUMAN | 1   | MRLAVGALLVCAV <sup>1</sup> LG <sup>2</sup> LCLAVPDKTV <sup>3</sup> RWCAVSEHEA <sup>4</sup> TKC <sup>5</sup> QISFRDHMK <sup>6</sup> SVIP <sup>7</sup> SDGPR <sup>8</sup> VACVK <sup>9</sup>                                                                                                                                        |
| sp Q921I1 TRFE_MOUSE | 61  | KTSY <sup>1</sup> PCIK <sup>2</sup> AK <sup>3</sup> IS <sup>4</sup> ASEADAM <sup>5</sup> TLD <sup>6</sup> GG <sup>7</sup> WVYDA <sup>8</sup> GL <sup>9</sup> T <sup>10</sup> PNNLKP <sup>11</sup> VAAEFYGS <sup>12</sup> VEH <sup>13</sup> PQTY <sup>14</sup> YYAVAV <sup>15</sup> V                                              |
| sp P02787 TRFE_HUMAN | 61  | KASY <sup>1</sup> LDCI <sup>2</sup> RAIA <sup>3</sup> ANEADA <sup>4</sup> VTLDA <sup>5</sup> GL <sup>6</sup> VYDA <sup>7</sup> VLA <sup>8</sup> PNNLKP <sup>9</sup> VAAEFYGS <sup>10</sup> KED <sup>11</sup> PQTY <sup>12</sup> YYAVAV <sup>13</sup> V                                                                            |
| sp Q921I1 TRFE_MOUSE | 121 | KKGT <sup>1</sup> DF <sup>2</sup> QLN <sup>3</sup> NQLE <sup>4</sup> GKKSCHT <sup>5</sup> GLGRSAGW <sup>6</sup> V <sup>7</sup> IP <sup>8</sup> I <sup>9</sup> GLLE <sup>10</sup> FC <sup>11</sup> KL <sup>12</sup> SEPR <sup>13</sup> SPLEKAV <sup>14</sup> SEFFSGSC <sup>15</sup> VPC <sup>16</sup>                              |
| sp P02787 TRFE_HUMAN | 121 | KKDS <sup>1</sup> SG <sup>2</sup> FQMN <sup>3</sup> NQLR <sup>4</sup> GKKSCHT <sup>5</sup> GLGRSAGW <sup>6</sup> N <sup>7</sup> IP <sup>8</sup> I <sup>9</sup> GLLE <sup>10</sup> YCD <sup>11</sup> LP <sup>12</sup> EPR <sup>13</sup> KPLEKAV <sup>14</sup> ANFFSGSC <sup>15</sup> APC <sup>16</sup>                             |
| sp Q921I1 TRFE_MOUSE | 181 | ADP <sup>1</sup> VAF <sup>2</sup> FK <sup>3</sup> LCQLCPGCGCS <sup>4</sup> ST <sup>5</sup> Q <sup>6</sup> PF <sup>7</sup> FGY <sup>8</sup> VGA <sup>9</sup> FKCLKDG <sup>10</sup> G <sup>11</sup> GDVAFVKH <sup>12</sup> TTIFE <sup>13</sup> V <sup>14</sup> LPEKADR <sup>15</sup> D                                              |
| sp P02787 TRFE_HUMAN | 181 | ADG <sup>1</sup> TDF <sup>2</sup> Q <sup>3</sup> LCQLCPGCGCS <sup>4</sup> ST <sup>5</sup> LN <sup>6</sup> Q <sup>7</sup> YFGY <sup>8</sup> S <sup>9</sup> GAFKCLKDG <sup>10</sup> A <sup>11</sup> GDVAFVKH <sup>12</sup> STIFE <sup>13</sup> N <sup>14</sup> LANKADR <sup>15</sup> D                                              |
| sp Q921I1 TRFE_MOUSE | 241 | QYELLCLDNTRKPV <sup>1</sup> DQ <sup>2</sup> YEDC <sup>3</sup> YLAR <sup>4</sup> IP <sup>5</sup> SHA <sup>6</sup> VVAR <sup>7</sup> KNN <sup>8</sup> GKEDLIWE <sup>9</sup> IT <sup>10</sup> KV <sup>11</sup> AOEHFGK <sup>12</sup> GKSK <sup>13</sup> D                                                                            |
| sp P02787 TRFE_HUMAN | 241 | QYELLCLDNTRKPV <sup>1</sup> D <sup>2</sup> YKDC <sup>3</sup> H <sup>4</sup> LAQ <sup>5</sup> VPSH <sup>6</sup> T <sup>7</sup> VVAR <sup>8</sup> SMG <sup>9</sup> GKEDLIWE <sup>10</sup> LL <sup>11</sup> NQ <sup>12</sup> AOEHFGK <sup>13</sup> DKSKE <sup>14</sup>                                                               |
| sp Q921I1 TRFE_MOUSE | 301 | FOLFSS <sup>1</sup> PL <sup>2</sup> GKDLLFKDSA <sup>3</sup> F <sup>4</sup> GL <sup>5</sup> LRVPPRMD <sup>6</sup> Y <sup>7</sup> R <sup>8</sup> LYLGH <sup>9</sup> N <sup>10</sup> YVTAIRN <sup>11</sup> QQEG <sup>12</sup> V <sup>13</sup> CPE <sup>14</sup> G <sup>15</sup> .S <sup>16</sup> ID <sup>17</sup> NS <sup>18</sup> P |
| sp P02787 TRFE_HUMAN | 301 | FOLFSS <sup>1</sup> PH <sup>2</sup> GKDLLFKDSA <sup>3</sup> H <sup>4</sup> GF <sup>5</sup> LRVPPRMD <sup>6</sup> A <sup>7</sup> KMYLGY <sup>8</sup> EB <sup>9</sup> YVTAIRN <sup>10</sup> LR <sup>11</sup> EGT <sup>12</sup> CPE <sup>13</sup> APT <sup>14</sup> DECK <sup>15</sup> P                                             |
| sp Q921I1 TRFE_MOUSE | 360 | VKWCALSH <sup>1</sup> LER <sup>2</sup> TKCDEWS <sup>3</sup> I <sup>4</sup> ISE <sup>5</sup> GKIEC <sup>6</sup> EAETTEDCI <sup>7</sup> E <sup>8</sup> KI <sup>9</sup> VNGEADAM <sup>10</sup> TL <sup>11</sup> DGG <sup>12</sup> HAYIAG <sup>13</sup> Q                                                                             |
| sp P02787 TRFE_HUMAN | 361 | VKWCALSH <sup>1</sup> HER <sup>2</sup> LK <sup>3</sup> CDEWS <sup>4</sup> VNS <sup>5</sup> V <sup>6</sup> GKIEC <sup>7</sup> V <sup>8</sup> EAETTEDCI <sup>9</sup> A <sup>10</sup> KIM <sup>11</sup> NGEADAMS <sup>12</sup> SL <sup>13</sup> DGG <sup>14</sup> FVYIAG <sup>15</sup> K                                             |
| sp Q921I1 TRFE_MOUSE | 420 | CGLVPVMAE <sup>1</sup> Y <sup>2</sup> ESSNCAIP <sup>3</sup> S <sup>4</sup> QQGIFPK <sup>5</sup> GY <sup>6</sup> YAVAVVKA <sup>7</sup> SD <sup>8</sup> TS <sup>9</sup> ITW <sup>10</sup> N <sup>11</sup> NLKGKKSCHT <sup>12</sup> GV <sup>13</sup> DR <sup>14</sup> T                                                              |
| sp P02787 TRFE_HUMAN | 421 | CGLVPVLAEN <sup>1</sup> Y <sup>2</sup> NKS... <sup>3</sup> DN <sup>4</sup> CEDTPEA <sup>5</sup> GY <sup>6</sup> F <sup>7</sup> AVAVVKA <sup>8</sup> SD <sup>9</sup> DL <sup>10</sup> TW <sup>11</sup> N <sup>12</sup> NLKGKKSCHT <sup>13</sup> AV <sup>14</sup> GR <sup>15</sup> T                                                |
| sp Q921I1 TRFE_MOUSE | 480 | AGWNIPMG <sup>1</sup> MLYN <sup>2</sup> RINHC <sup>3</sup> KFDEFFS <sup>4</sup> Q <sup>5</sup> GCAPGYE <sup>6</sup> K <sup>7</sup> N <sup>8</sup> STLCL <sup>9</sup> LCIGP <sup>10</sup> .L <sup>11</sup> K <sup>12</sup> CAPNNKE <sup>13</sup> EYNGY <sup>14</sup>                                                               |
| sp P02787 TRFE_HUMAN | 477 | AGWNIPMG <sup>1</sup> MLYN <sup>2</sup> KINHC <sup>3</sup> R <sup>4</sup> FDEFFS <sup>5</sup> E <sup>6</sup> GCAPGSK <sup>7</sup> K <sup>8</sup> D <sup>9</sup> SSLCL <sup>10</sup> LCMG <sup>11</sup> SGINL <sup>12</sup> CEPNNKE <sup>13</sup> GYGY <sup>14</sup>                                                               |
| sp Q921I1 TRFE_MOUSE | 538 | TGAFRCLVEKGDVAFVKHOTV <sup>1</sup> LD <sup>2</sup> NTE <sup>3</sup> GKNP <sup>4</sup> AE <sup>5</sup> WAKNL <sup>6</sup> KQE <sup>7</sup> DFELLC <sup>8</sup> PDGTRKPV <sup>9</sup> KDFASC <sup>10</sup>                                                                                                                          |
| sp P02787 TRFE_HUMAN | 537 | TGAFRCLVEKGDVAFVKHOTV <sup>1</sup> P <sup>2</sup> QNT <sup>3</sup> GKNP <sup>4</sup> DP <sup>5</sup> WAKNL <sup>6</sup> NEK <sup>7</sup> DYELLC <sup>8</sup> LDGTRKPV <sup>9</sup> EYANC <sup>10</sup>                                                                                                                            |
| sp Q921I1 TRFE_MOUSE | 598 | HLAQ <sup>1</sup> APNH <sup>2</sup> VVSRKE <sup>3</sup> KAARV <sup>4</sup> KAVL <sup>5</sup> TSQETLFGG <sup>6</sup> .S <sup>7</sup> DC <sup>8</sup> TGNFCLF <sup>9</sup> K <sup>10</sup> ST <sup>11</sup> TKDLLFRDD <sup>12</sup> TK <sup>13</sup> C                                                                              |
| sp P02787 TRFE_HUMAN | 597 | HLAR <sup>1</sup> APNH <sup>2</sup> AVVTRK <sup>3</sup> KEACV <sup>4</sup> HRIL <sup>5</sup> RQQH <sup>6</sup> LFGSNV <sup>7</sup> ID <sup>8</sup> CSGNFCLF <sup>9</sup> RS <sup>10</sup> E <sup>11</sup> TKDLLFRDD <sup>12</sup> TV <sup>13</sup> C                                                                              |
| sp Q921I1 TRFE_MOUSE | 656 | FV <sup>1</sup> KL <sup>2</sup> PE <sup>3</sup> GT <sup>4</sup> TP <sup>5</sup> EKYLGA <sup>6</sup> EYMQ <sup>7</sup> SVGNMRK <sup>8</sup> CSTS <sup>9</sup> R <sup>10</sup> LLEACT <sup>11</sup> FHK <sup>12</sup> H                                                                                                             |
| sp P02787 TRFE_HUMAN | 657 | LAK <sup>1</sup> L <sup>2</sup> HD <sup>3</sup> RNT <sup>4</sup> YEKYLGE <sup>5</sup> EYVKA <sup>6</sup> VGNLRK <sup>7</sup> CSTS <sup>8</sup> S <sup>9</sup> LLEACT <sup>10</sup> FRR <sup>11</sup> P                                                                                                                            |

**Figure XXVI.** Structural comparison of the serotransferrin between *Mus musculus* and *Homo sapiens*. The FASTA files related to rodent and human proteins were acquired on the UNIPROT search platform (<http://www.uniprot.org>).

### **Attachment 3**

(Blood analysis- Manual counting)

#### **Results and discussion for blood analysis (manual counting)**

Fish inoculated with *A. hydrophila* showed a significant decrease ( $p < 0.05$ ) in erythrocyte, leukocyte and granulocyte counts 6 HPI when compared to animals inoculated with saline (Figure XXVII and XXVIII). No difference was observed in the number of circulating lymphocytes, thrombocytes and monocytes 6 and 24 HPI (Figure XXVIII). The study of hematocrit, MCV, hemoglobin and MCHC did not demonstrate significant variations during the experimental period (Figure XXVII). Similar to our results, Inoue et al.<sup>1</sup> showed correlation between manual counting and flow cytometry of fish blood cells. According to these authors, this technique presented advantages, because it is a simple and rapid method for analysis of fish blood cells.

Automatic counting methods have been routinely used for the diagnosis of diseases in mammals. However, the techniques applied to mammalian blood depend on lysing the erythrocytes, and then the remaining leukocytes can be counted automatically by the machine. In fish, these techniques are not precise, since their erythrocytes are nucleated, and the glutinous nature of released chromatin from red blood cells interferes with automated counting<sup>2</sup>. On the other hand, the limitations of the use of flow cytometry would be the high costs of the analysis, such fact difficult its use in routine clinical analysis, besides the need for technical training to carry out the sampling.

#### **Material and Methods for blood analysis**

Blood samples were drawn from the caudal vessel. Red (RBC) and white blood cell (WBC) counts were made using a haemocytometer and Natt and Herrick solution. The haemoglobin concentration (Hb) was determined with Drabkin's reagent read at 540 nm and haematocrit (Ht) by a microhaematocrit centrifugation technique. Mean cell volume (MCV) and cell haemoglobin concentration (MCHC) were calculated from the Ht, [Hb] and RBC. Blood smears for differential leukocyte counts were stained with a combination of May-Grünwald Giemsa and Wright's Method<sup>3</sup>.

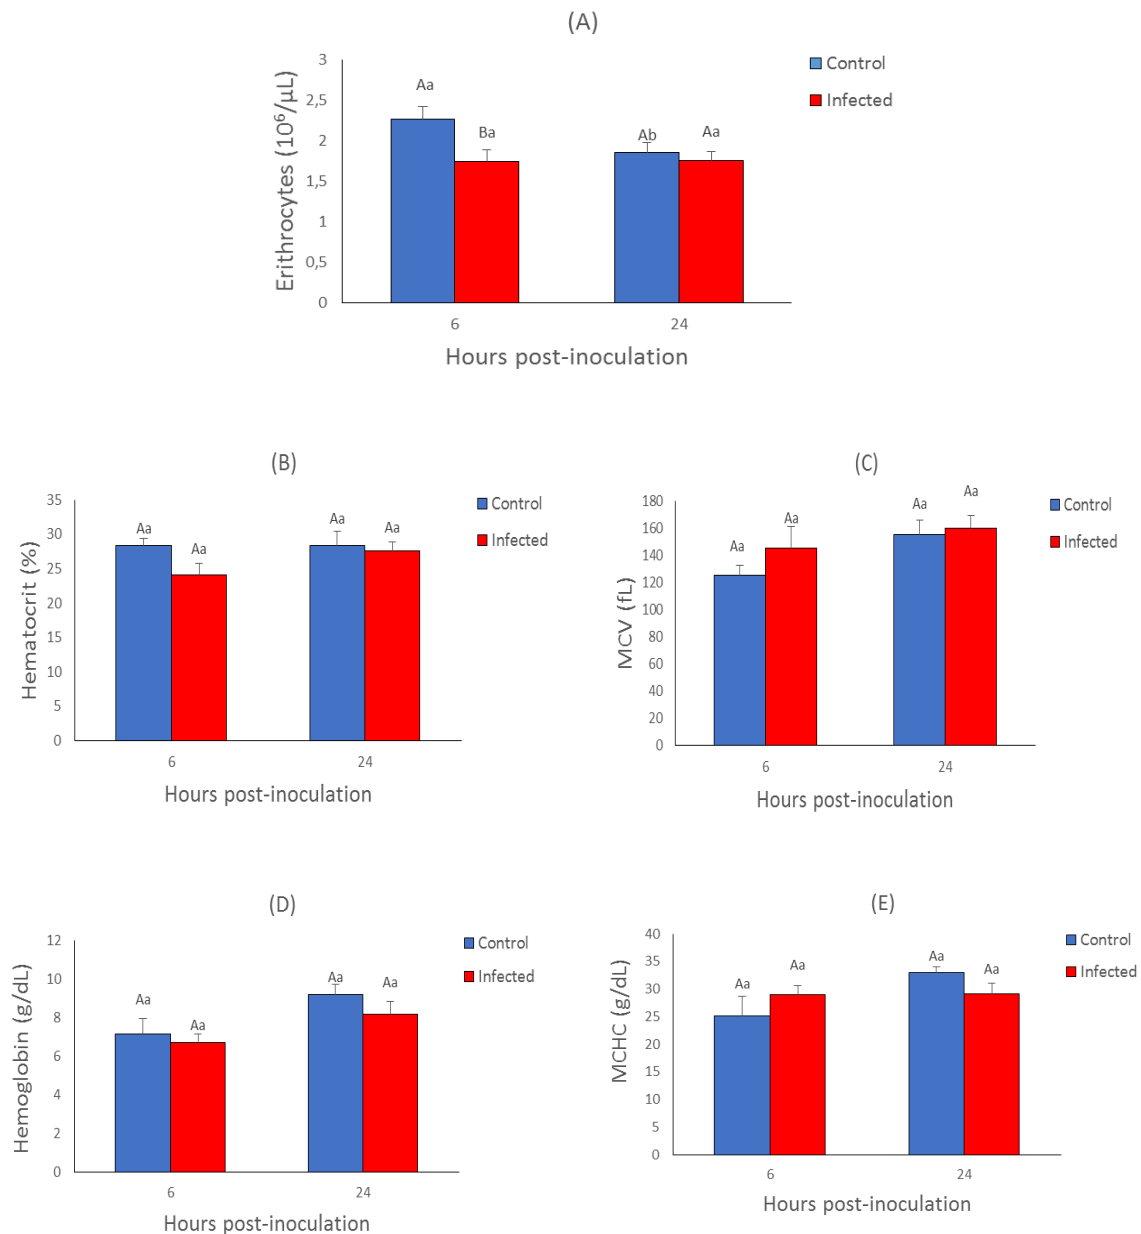

**Figure XXVII.** Mean values ( $\pm$ SE) and ANOVA for hematological parameters: (A) Number of erythrocytes; (B) Hematocrit; (C) MCV - Mean corpuscular volume; (D) Hemoglobin; (E) MCHC – Mean corpuscular hemoglobin concentration. Mean values (n=10) and ANOVA observed for total cells and differential counting of cells present in the blood during acute inflammatory response in tilapias 6 and 24 HPI. Means followed by the same letter do not differ by the Tukey test ( $P < 0,05$ ). The variance analysis is represented by capital letters to compare the different treatments within each experimental period, lowercase letters to compare the evolution of each treatment in the different experimental periods. Different letters indicate significant difference ( $p < 0,05$ ).



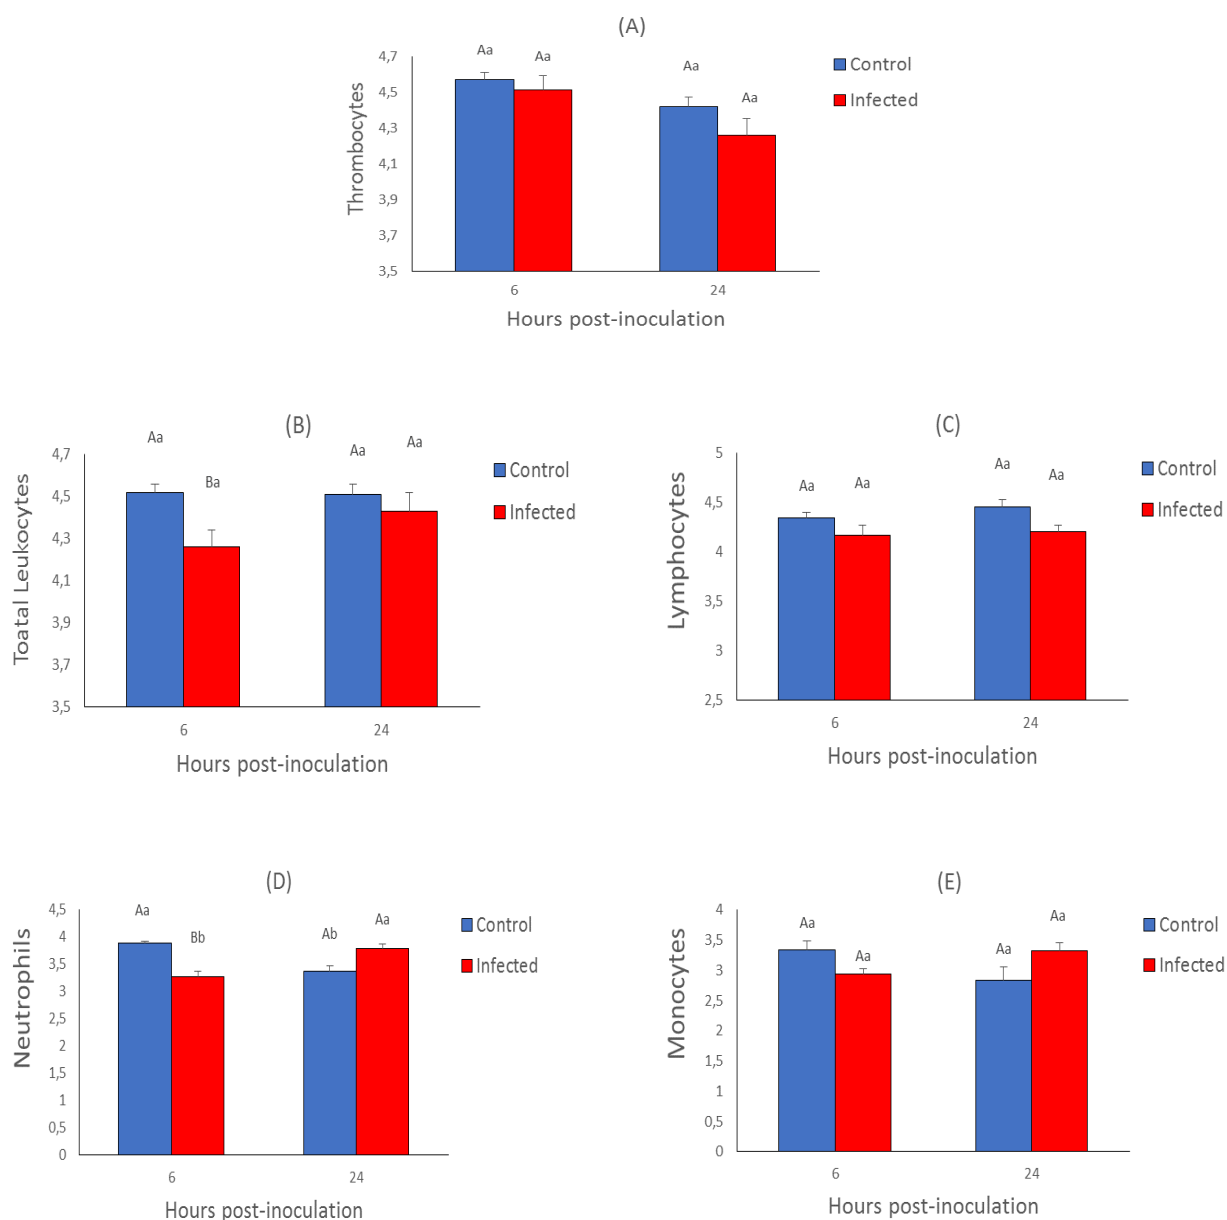

**Figure XXVIII.** Mean values ( $\pm$ SE, data transformed in Log  $x+1$ ) and ANOVA for thrombocyte and leukocyte counts: (A) Number of thrombocytes; (B) Number of leukocytes; (C) Number of lymphocytes; (D) Number of neutrophils; (E) Number of monocytes. Mean values ( $n=10$ ) and ANOVA observed for total cells and differential counting of cells present in the blood during acute inflammatory response in tilapias 6 and 24 HPI. Means followed by the same letter do not differ by the Tukey test ( $P<0,05$ ). The variance analysis is represented by capital letters to compare the different treatments within each experimental period, lowercase letters to compare the evolution of each treatment in the different experimental periods. Different letters indicate significant difference ( $p < 0.05$ ).

## References

1. Inoue, T. et al. A new method for fish leucocyte counting and partial differentiation by flow cytometry. *Fish Shellfish Immunol* **13**, 379-390, 2002.
2. Burgess, S. C. & Davison, T. F. Counting absolute numbers of specific leukocytes subpopulations in avian whole blood using a single-step flow cytometric technique: comparison of two inbred lines of chickens. *J. Immunol Methods* **227**, 169–176, (1999).
3. Belo, M. A. A. et al. Haematological response of curimbas *Prochilodus lineatus*, naturally infected with *Neoechinorhynchus curemai*. *J Fish Biol* **82** 1403-1410, (2013).
